# Supplementary material
Source: ML conference proceedings conference paper supplement (https://openreview.net/forum?id=pzgENfIRBil)
Supplement: supplementary_material [file attachment]

# SUPPLEMENTARY MATERIAL: THE FULL NUMERICAL RESULT IN APPENDIX E OF PAPER “SELF-CONSISTENT GRADIENT-LIKE EIGEN DECOMPOSITION IN SOLVING SCHRÖDINGER EQUATIONS”

Anonymous authors

Paper under double-blind review

| Molecule Name | Exact HF Energy<br>(Unit: Hartree) | $H_{\text{core}}$                                    | minao                                                | atom                                                 | huckel                                               | SCGLED<br>$T = 200$                                   | SCGLED<br>$T = 500$                                                         | SCGLED<br>$T = 1000$                                                        | SCGLED<br>$T = 2000$                                                       | SCGLED<br>$T = 5000$                                  | SCGLED<br>$T = 10000$                                 |
|---------------|------------------------------------|------------------------------------------------------|------------------------------------------------------|------------------------------------------------------|------------------------------------------------------|-------------------------------------------------------|-----------------------------------------------------------------------------|-----------------------------------------------------------------------------|----------------------------------------------------------------------------|-------------------------------------------------------|-------------------------------------------------------|
| acetaldehyde  | -152.842695                        | -130.487235<br>(+22.355460)<br>0.9 ms<br>✗           | -153.222210<br>(-0.379515)<br>37.2 ms<br>✓, 59 iters | -153.723694<br>(-0.880999)<br>43.9 ms<br>✓, 58 iters | -151.013594<br>(+1.829101)<br>46.7 ms<br>✓, 66 iters | -146.731514<br>(+6.111181)<br>5.0 ms<br>✗             | <b>-152.597728</b><br>( <b>+0.244967</b> )<br><b>11.7 ms</b><br>✓, 47 iters | <b>-152.875331</b><br>( <b>-0.032636</b> )<br><b>21.9 ms</b><br>✓, 39 iters | -152.842690<br>(+0.000005)<br>47.5 ms<br>✓, 14 iters                       | -152.842695<br>(+0.000000)<br>124.4 ms<br>✓, 1 iters  | -152.842695<br>(-0.000000)<br>231.7 ms<br>✓, 0 iters  |
| acetic        | -227.698712                        | -195.939403<br>(+31.759310)<br>1.0 ms<br>✗           | -228.436062<br>(-0.737350)<br>33.7 ms<br>✓, 60 iters | -229.017397<br>(-1.318685)<br>45.9 ms<br>✓, 59 iters | -225.710577<br>(+1.988135)<br>52.5 ms<br>✓, 68 iters | -219.321388<br>(+8.377325)<br>7.7 ms<br>✗             | <b>-227.380581</b><br>( <b>+0.318132</b> )<br><b>16.3 ms</b><br>✓, 44 iters | -227.700111<br>(-0.001399)<br>36.9 ms<br>✓, 41 iters                        | -227.698848<br>(-0.000136)<br>67.5 ms<br>✓, 25 iters                       | -227.698712<br>(-0.000000)<br>178.4 ms<br>✓, 1 iters  | -227.698712<br>(-0.000000)<br>349.7 ms<br>✓, 0 iters  |
| alcl          | -701.416908                        | -697.363310<br>(+4.053598)<br>0.8 ms<br>✗            | -701.365129<br>(+0.051779)<br>25.3 ms<br>✓, 11 iters | -701.421442<br>(-0.004534)<br>46.1 ms<br>✓, 11 iters | -701.312615<br>(+0.104292)<br>49.4 ms<br>✓, 10 iters | -698.109164<br>(+3.307744)<br>4.2 ms<br>✗             | -700.429691<br>(+0.987217)<br>10.0 ms<br>✓, 13 iters                        | -701.407504<br>(+0.009404)<br>18.5 ms<br>✓, 9 iters                         | -701.416897<br>(+0.000011)<br>37.9 ms<br>✓, 6 iters                        | -701.416909<br>(-0.000002)<br>97.4 ms<br>✓, 2 iters   | -701.416908<br>(-0.000001)<br>193.9 ms<br>✓, 2 iters  |
| alcl3         | -1620.461846                       | -1611.231641<br>(+9.230204)<br>1.5 ms<br>✓, 12 iters | -1620.837026<br>(-0.375181)<br>25.1 ms<br>✓, 9 iters | -1620.938891<br>(-0.477045)<br>45.4 ms<br>✓, 9 iters | -1620.113643<br>(+0.348203)<br>45.2 ms<br>✓, 9 iters | -1613.394902<br>(+7.066943)<br>12.9 ms<br>✓, 11 iters | -1618.465135<br>(+1.996711)<br>30.7 ms<br>✓, 10 iters                       | -1620.436260<br>(+0.025586)<br>63.6 ms<br>✓, 9 iters                        | -1620.462297<br>(-0.000451)<br>124.7 ms<br>✓, 7 iters                      | -1620.461851<br>(-0.000005)<br>312.2 ms<br>✓, 3 iters | -1620.461853<br>(-0.000007)<br>615.0 ms<br>✓, 4 iters |
| alf           | -341.372481                        | -332.777287<br>(+8.595194)<br>0.7 ms<br>✗            | -341.184261<br>(+0.188220)<br>22.5 ms<br>✓, 25 iters | -341.175841<br>(+0.196640)<br>43.4 ms<br>✓, 25 iters | -341.216095<br>(+0.156385)<br>44.5 ms<br>✓, 24 iters | -337.326280<br>(+4.046200)<br>3.3 ms<br>✗             | -341.143775<br>(+0.282706)<br>8.5 ms<br>✓, 24 iters                         | <b>-341.365957</b><br>( <b>+0.006524</b> )<br><b>16.8 ms</b><br>✓, 14 iters | -341.372509<br>(-0.000028)<br>30.8 ms<br>✓, 7 iters                        | -341.372540<br>(-0.000059)<br>75.6 ms<br>✓, 7 iters   | -341.372540<br>(-0.000000)<br>154.8 ms<br>✓, 7 iters  |
| alf3          | -540.340281                        | -521.188584<br>(+19.151697)<br>1.0 ms<br>✓, 32 iters | -540.193601<br>(+0.146680)<br>23.0 ms<br>✓, 21 iters | -540.099917<br>(+0.240364)<br>41.7 ms<br>✓, 22 iters | -539.957282<br>(+0.382999)<br>44.5 ms<br>✓, 21 iters | -531.290901<br>(+9.049380)<br>6.3 ms<br>✓, 28 iters   | -539.900935<br>(+0.439346)<br>16.2 ms<br>✓, 21 iters                        | -540.330273<br>(+0.010008)<br>32.6 ms<br>✓, 13 iters                        | -540.341125<br>(-0.000844)<br>62.6 ms<br>✓, 11 iters                       | -540.340301<br>(-0.000020)<br>154.5 ms<br>✓, 6 iters  | -540.340281<br>(-0.000000)<br>312.2 ms<br>✓, 1 iters  |
| alh           | -242.426380                        | -241.169937<br>(+1.256443)<br>0.7 ms<br>✓, 10 iters  | -242.202780<br>(+0.223600)<br>22.7 ms<br>✓, 9 iters  | -242.260623<br>(+0.165756)<br>24.3 ms<br>✓, 9 iters  | -242.367860<br>(+0.058520)<br>28.4 ms<br>✓, 9 iters  | -241.419954<br>(+1.006425)<br>3.2 ms<br>✓, 9 iters    | -242.173320<br>(+0.253060)<br>6.2 ms<br>✓, 8 iters                          | <b>-242.419485</b><br>( <b>+0.006894</b> )<br><b>13.8 ms</b><br>✓, 7 iters  | <b>-242.426375</b><br>( <b>+0.000005</b> )<br><b>21.6 ms</b><br>✓, 4 iters | -242.426380<br>(+0.000000)<br>54.2 ms<br>✓, 0 iters   | -242.426380<br>(-0.000000)<br>111.0 ms<br>✓, 0 iters  |
| alh3          | -243.587761                        | -241.286329<br>(+2.301432)<br>0.7 ms<br>✓, 8 iters   | -243.210264<br>(+0.377497)<br>23.6 ms<br>✓, 8 iters  | -243.335237<br>(+0.252524)<br>25.0 ms<br>✓, 8 iters  | -243.393303<br>(+0.194458)<br>25.4 ms<br>✓, 8 iters  | -241.764754<br>(+1.823007)<br>1.2 ms<br>✓, 8 iters    | -243.205226<br>(+0.382535)<br>6.3 ms<br>✓, 7 iters                          | <b>-243.581977</b><br>( <b>+0.005783</b> )<br><b>12.9 ms</b><br>✓, 5 iters  | -243.587759<br>(+0.000002)<br>24.7 ms<br>✓, 3 iters                        | -243.587761<br>(-0.000000)<br>60.0 ms<br>✓, 1 iters   | -243.587762<br>(-0.000001)<br>126.8 ms<br>✓, 2 iters  |
| allene        | -115.820914                        | -98.473564<br>(+17.347350)<br>1.0 ms<br>✗            | -116.307122<br>(-0.486208)<br>22.4 ms<br>✓, 13 iters | -116.861841<br>(-1.040927)<br>20.9 ms<br>✓, 14 iters | -114.388774<br>(+1.432140)<br>21.4 ms<br>✓, 17 iters | -109.461219<br>(+6.359695)<br>5.0 ms<br>✗             | -115.617963<br>(+0.202951)<br>13.8 ms<br>✓, 15 iters                        | -115.818848<br>(+0.002066)<br>24.7 ms<br>✓, 12 iters                        | -115.821865<br>(-0.000952)<br>47.0 ms<br>✓, 12 iters                       | -115.820914<br>(-0.000000)<br>118.6 ms<br>✓, 6 iters  | -115.820914<br>(-0.000000)<br>238.3 ms<br>✓, 1 iters  |
| b2h6          | -52.774881                         | -43.835427<br>(+8.939454)<br>0.9 ms<br>✓, 10 iters   | -52.943715<br>(-0.168834)<br>25.9 ms<br>✓, 8 iters   | -53.376930<br>(-0.602049)<br>23.2 ms<br>✓, 8 iters   | -51.320838<br>(+1.454043)<br>22.2 ms<br>✓, 9 iters   | -49.045525<br>(+3.729356)<br>3.8 ms<br>✓, 10 iters    | -51.984252<br>(+0.790629)<br>8.7 ms<br>✓, 9 iters                           | -52.517218<br>(+0.257663)<br>17.4 ms<br>✓, 14 iters                         | -52.777013<br>(-0.002132)<br>33.8 ms<br>✓, 10 iters                        | -52.774881<br>(+0.000000)<br>87.7 ms<br>✓, 0 iters    | -52.774881<br>(-0.000000)<br>159.9 ms<br>✓, 0 iters   |
| benzene       | -230.623825                        | -203.993141<br>(+26.630684)<br>1.9 ms<br>✓, 23 iters | -232.354772<br>(-1.730947)<br>23.9 ms<br>✓, 9 iters  | -233.683144<br>(-3.059319)<br>22.6 ms<br>✓, 9 iters  | -228.070443<br>(+2.553382)<br>23.8 ms<br>✓, 10 iters | -211.964590<br>(+18.659236)<br>17.4 ms<br>✗           | -230.215189<br>(+0.408636)<br>40.9 ms<br>✓, 26 iters                        | -230.615998<br>(+0.007827)<br>87.3 ms<br>✓, 16 iters                        | -230.623789<br>(+0.000036)<br>169.2 ms<br>✓, 14 iters                      | -230.623826<br>(-0.000000)<br>426.4 ms<br>✓, 4 iters  | -230.623825<br>(-0.000000)<br>837.3 ms<br>✓, 2 iters  |
| beta-lactim   | -245.646165                        | -209.854368<br>(+35.791796)<br>1.4 ms<br>✗           | -246.932707<br>(-1.286543)<br>50.5 ms<br>✓, 44 iters | -247.982362<br>(-2.336198)<br>63.4 ms<br>✓, 46 iters | -243.196721<br>(+2.449444)<br>68.0 ms<br>✓, 52 iters | -232.347018<br>(+13.299147)<br>13.4 ms<br>✗           | <b>-244.654303</b><br>( <b>+0.991862</b> )<br><b>29.8 ms</b><br>✓, 41 iters | -245.602598<br>(+0.043566)<br>59.2 ms<br>✓, 36 iters                        | -245.645403<br>(+0.000761)<br>120.4 ms<br>✓, 16 iters                      | -245.646167<br>(-0.000002)<br>302.5 ms<br>✓, 4 iters  | -245.646165<br>(-0.000000)<br>599.1 ms<br>✓, 0 iters  |
| bf            | -124.057391                        | -115.853479<br>(+8.203912)<br>0.8 ms<br>✗            | -124.123147<br>(-0.065756)<br>23.1 ms<br>✓, 24 iters | -124.172813<br>(-0.115422)<br>40.5 ms<br>✓, 24 iters | -123.788632<br>(+0.268759)<br>43.9 ms<br>✓, 25 iters | -119.460262<br>(+4.597129)<br>2.3 ms<br>✗             | -123.442889<br>(+0.614501)<br>7.3 ms<br>✓, 25 iters                         | -123.625609<br>(+0.431781)<br>12.6 ms<br>✓, 18 iters                        | -124.006451<br>(+0.050939)<br>24.2 ms<br>✓, 15 iters                       | -124.057391<br>(+0.000000)<br>59.9 ms<br>✓, 3 iters   | -124.057391<br>(-0.000000)<br>115.8 ms<br>✓, 1 iters  |
| bf3           | -323.083876                        | -304.403095<br>(+18.680781)<br>0.9 ms<br>✓, 26 iters | -323.550027<br>(-0.466151)<br>23.8 ms<br>✓, 19 iters | -323.620542<br>(-0.536665)<br>40.5 ms<br>✓, 19 iters | -322.258547<br>(+0.825329)<br>41.5 ms<br>✓, 19 iters | -313.813968<br>(+9.269909)<br>4.7 ms<br>✓, 22 iters   | <b>-322.675593</b><br>( <b>+0.408283</b> )<br><b>11.9 ms</b><br>✓, 19 iters | <b>-323.086211</b><br>( <b>-0.002335</b> )<br><b>23.4 ms</b><br>✓, 13 iters | -323.084097<br>(-0.000220)<br>48.9 ms<br>✓, 11 iters                       | -323.083876<br>(-0.000000)<br>114.6 ms<br>✓, 2 iters  | -323.083876<br>(-0.000000)<br>243.0 ms<br>✓, 0 iters  |

|        |              |                                                      |                                                       |                                                       |                                                       |                                                       |                                                                    |                                                                    |                                                                   |                                                        |                                                           |
|--------|--------------|------------------------------------------------------|-------------------------------------------------------|-------------------------------------------------------|-------------------------------------------------------|-------------------------------------------------------|--------------------------------------------------------------------|--------------------------------------------------------------------|-------------------------------------------------------------------|--------------------------------------------------------|-----------------------------------------------------------|
| bh     | -25.108974   | -23.514271<br>(+1.594702)<br>0.7 ms<br>✓, 10 iters   | -24.897850<br>(+0.211124)<br>23.3 ms<br>✓, 9 iters    | -24.962099<br>(+0.146875)<br>21.7 ms<br>✓, 9 iters    | -25.013282<br>(+0.095692)<br>24.8 ms<br>✓, 9 iters    | -24.250903<br>(+0.858070)<br>2.2 ms<br>✓, 9 iters     | -24.829163<br>(+0.279810)<br>4.1 ms<br>✓, 8 iters                  | -24.874847<br>(+0.234127)<br>9.2 ms<br>✓, 7 iters                  | -24.875456<br>(+0.233518)<br>17.3 ms<br>✓, 4 iters                | -24.875457<br>(+0.233517)<br>41.9 ms<br>✗, 0 iters     | -24.875457<br>(+0.233517)<br>74.3 ms<br>✓, 0 iters        |
| bh3    | -26.376765   | -23.340462<br>(+3.036303)<br>0.6 ms<br>✓, 8 iters    | -26.099230<br>(+0.277535)<br>22.7 ms<br>✓, 8 iters    | -26.253321<br>(+0.123444)<br>23.5 ms<br>✓, 8 iters    | -25.859660<br>(+0.517105)<br>23.0 ms<br>✓, 9 iters    | -25.241343<br>(+1.135422)<br>2.0 ms<br>✓, 7 iters     | <b>-26.370195</b><br>(+0.006570)<br><b>4.5 ms</b><br>✓, 7 iters    | <b>-26.377280</b><br>(-0.000516)<br><b>9.2 ms</b><br>✓, 5 iters    | <b>-26.376765</b><br>(+0.000000)<br><b>18.4 ms</b><br>✓, 3 iters  | -26.376765<br>(-0.000000)<br>45.6 ms<br>✗, 0 iters     | -26.376765<br>(+0.000000)<br>90.0 ms<br>✓, 0 iters        |
| bhf2   | -224.187016  | -209.148734<br>(+15.038283)<br>1.0 ms<br>✗           | -224.388498<br>(-0.201482)<br>34.8 ms<br>✓, 20 iters  | -224.494862<br>(-0.307846)<br>44.5 ms<br>✓, 20 iters  | -223.457386<br>(+0.729630)<br>44.3 ms<br>✓, 21 iters  | -215.841942<br>(+8.345074)<br>4.0 ms<br>✗             | -223.007455<br>(+1.179561)<br>9.7 ms<br>✓, 20 iters                | <b>-224.187065</b><br>(-0.000048)<br><b>22.7 ms</b><br>✓, 13 iters | -224.187003<br>(+0.000013)<br>43.7 ms<br>✓, 8 iters               | -224.187029<br>(-0.000012)<br>92.3 ms<br>✓, 9 iters    | -224.187016<br>(-0.000000)<br>186.8 ms<br>✓, 0 iters      |
| borole | -178.940722  | -154.493281<br>(+24.447440)<br>1.6 ms<br>✗           | -180.076021<br>(-1.135300)<br>37.2 ms<br>✓, 29 iters  | -181.069227<br>(-2.128505)<br>47.2 ms<br>✓, 28 iters  | -176.908868<br>(+2.031854)<br>51.0 ms<br>✓, 30 iters  | -169.551770<br>(+9.388952)<br>13.1 ms<br>✗            | -177.388757<br>(+1.551965)<br>27.3 ms<br>✓, 30 iters               | -179.071761<br>(-0.131039)<br>57.3 ms<br>✓, 23 iters               | -178.941014<br>(-0.000292)<br>113.6 ms<br>✓, 16 iters             | -178.940722<br>(-0.000001)<br>282.3 ms<br>✓, 2 iters   | -178.940722<br>(-0.000000)<br>563.0 ms<br>✓, 1 iters      |
| c-hcoh | -113.714969  | -104.101835<br>(+9.613134)<br>0.8 ms<br>✗            | -113.822094<br>(-0.107125)<br>34.4 ms<br>✓, 26 iters  | -114.062328<br>(-0.347359)<br>43.4 ms<br>✓, 26 iters  | -113.315364<br>(+0.399605)<br>43.4 ms<br>✓, 24 iters  | -107.988049<br>(+5.726920)<br>2.6 ms<br>✗             | -113.565420<br>(+0.149549)<br>6.8 ms<br>✓, 25 iters                | <b>-113.713011</b><br>(+0.001958)<br><b>13.4 ms</b><br>✓, 13 iters | <b>-113.714957</b><br>(+0.000012)<br><b>25.9 ms</b><br>✓, 7 iters | -113.714969<br>(+0.000000)<br>64.1 ms<br>✗, 0 iters    | -113.714969<br>(-0.000000)<br>128.7 ms<br>✓, 0 iters      |
| c-hono | -204.518517  | -191.510455<br>(+13.008062)<br>0.8 ms<br>✗           | -204.943947<br>(-0.425430)<br>36.9 ms<br>✗            | -205.241426<br>(-0.722909)<br>44.7 ms<br>✗            | -203.716118<br>(+0.802399)<br>48.3 ms<br>✗            | -197.644594<br>(+6.873923)<br>3.7 ms<br>✗             | <b>-204.178061</b><br>(+0.340456)<br><b>9.0 ms</b><br>✓, 152 iters | <b>-204.514620</b><br>(+0.003897)<br><b>18.5 ms</b><br>✓, 87 iters | -204.518437<br>(+0.000080)<br>41.0 ms<br>✓, 40 iters              | -204.518517<br>(+0.000000)<br>102.5 ms<br>✗, 0 iters   | -204.518517<br>(-0.000000)<br>204.4 ms<br>✓, 0 iters      |
| c-n2h2 | -109.913041  | -100.608217<br>(+9.304823)<br>0.8 ms<br>✓, 14 iters  | -110.021877<br>(-0.108836)<br>25.1 ms<br>✓, 10 iters  | -110.367326<br>(-0.454285)<br>21.2 ms<br>✓, 10 iters  | -109.490583<br>(+0.422458)<br>21.1 ms<br>✓, 11 iters  | -103.614440<br>(+6.298601)<br>2.8 ms<br>✗             | -109.872615<br>(+0.040426)<br>6.8 ms<br>✓, 42 iters                | -109.906551<br>(+0.006490)<br>13.2 ms<br>✓, 23 iters               | -109.912875<br>(+0.000165)<br>24.5 ms<br>✓, 13 iters              | -109.913041<br>(-0.000000)<br>64.4 ms<br>✓, 6 iters    | -109.913041<br>(-0.000000)<br>128.6 ms<br>✓, 3 iters      |
| c2c12  | -994.503905  | -985.576209<br>(+8.927696)<br>1.1 ms<br>✓, 16 iters  | -995.523119<br>(-1.019214)<br>26.5 ms<br>✓, 12 iters  | -995.902732<br>(-1.398826)<br>41.7 ms<br>✓, 10 iters  | -993.479411<br>(+1.024495)<br>45.6 ms<br>✓, 14 iters  | -985.180968<br>(+9.322937)<br>8.6 ms<br>✗             | -991.915619<br>(+2.588286)<br>21.7 ms<br>✓, 54 iters               | -994.208929<br>(+0.294977)<br>43.9 ms<br>✓, 49 iters               | -994.500629<br>(+0.000000)<br>89.7 ms<br>✓, 33 iters              | -994.503906<br>(-0.000000)<br>233.1 ms<br>✓, 12 iters  | -994.503905<br>(-0.000000)<br>455.1 ms<br>✓, 1 iters      |
| c2c14  | -1913.460496 | -1882.025268<br>(+31.435228)<br>1.8 ms<br>✗          | -1914.917127<br>(-1.456631)<br>27.4 ms<br>✓, 23 iters | -1915.487661<br>(-2.027165)<br>45.4 ms<br>✓, 22 iters | -1911.732894<br>(+1.727601)<br>49.9 ms<br>✓, 26 iters | -1903.925727<br>(+9.534768)<br>28.7 ms<br>✓, 23 iters | -1910.890142<br>(+2.570353)<br>62.9 ms<br>✓, 18 iters              | -1913.437762<br>(+0.022733)<br>125.6 ms<br>✓, 16 iters             | -1913.461041<br>(-0.000545)<br>260.7 ms<br>✓, 8 iters             | -1913.460509<br>(-0.000013)<br>631.4 ms<br>✓, 10 iters | -1913.460496<br>(-0.000000)<br>1233.8 ms<br>✓, 4 iters    |
| c2c16  | -2832.359449 | -2795.661600<br>(+36.697849)<br>2.9 ms<br>✗          | -2834.069671<br>(-1.710222)<br>25.4 ms<br>✓, 44 iters | -2834.760311<br>(-2.400862)<br>51.2 ms<br>✓, 42 iters | -2829.782166<br>(+2.577283)<br>49.8 ms<br>✗           | -2816.515709<br>(+15.843740)<br>63.8 ms<br>✗          | -2828.271639<br>(+4.087810)<br>133.7 ms<br>✓, 35 iters             | -2832.327584<br>(+0.031865)<br>266.8 ms<br>✓, 25 iters             | -2984.237760<br>(-151.878311)<br>524.8 ms<br>✗                    | -2985.696188<br>(-153.336739)<br>1367.8 ms<br>✗        | -3222.117477<br>(-389.758028)<br>2737.2 ms<br>✓, 42 iters |
| c2clh  | -535.649074  | -522.399737<br>(+13.249337)<br>1.0 ms<br>✗           | -536.244496<br>(-0.595422)<br>36.9 ms<br>✓, 60 iters  | -536.566867<br>(-0.917793)<br>45.7 ms<br>✓, 61 iters  | -534.605364<br>(+1.043710)<br>44.2 ms<br>✓, 68 iters  | -529.482299<br>(+6.166775)<br>6.5 ms<br>✗             | -534.836895<br>(+0.812179)<br>14.2 ms<br>✓, 44 iters               | -535.709507<br>(-0.060433)<br>24.5 ms<br>✓, 61 iters               | -535.649077<br>(-0.000004)<br>51.5 ms<br>✓, 5 iters               | -535.649078<br>(-0.000004)<br>137.5 ms<br>✓, 2 iters   | -535.649074<br>(-0.000000)<br>249.4 ms<br>✓, 0 iters      |
| c2clh3 | -536.879268  | -521.726546<br>(+15.152722)<br>1.0 ms<br>✗           | -537.303315<br>(-0.424047)<br>33.9 ms<br>✓, 19 iters  | -537.751997<br>(-0.872728)<br>46.2 ms<br>✓, 19 iters  | -535.609606<br>(+1.269662)<br>51.3 ms<br>✓, 21 iters  | -529.814691<br>(+7.064577)<br>5.9 ms<br>✗             | -535.989889<br>(+0.889379)<br>12.6 ms<br>✓, 13 iters               | <b>-536.873472</b><br>(+0.005796)<br><b>26.6 ms</b><br>✓, 11 iters | -536.879259<br>(+0.000010)<br>54.1 ms<br>✓, 8 iters               | -536.879268<br>(-0.000001)<br>135.1 ms<br>✓, 1 iters   | -536.879268<br>(-0.000000)<br>263.1 ms<br>✓, 0 iters      |
| c2clh5 | -538.077271  | -522.805650<br>(+15.271621)<br>1.2 ms<br>✗           | -538.365042<br>(-0.287771)<br>34.3 ms<br>✓, 14 iters  | -538.929320<br>(-0.852049)<br>43.7 ms<br>✓, 12 iters  | -536.513626<br>(+1.563645)<br>50.4 ms<br>✓, 16 iters  | -529.988247<br>(+8.089024)<br>7.3 ms<br>✗             | -537.235598<br>(+0.841673)<br>18.2 ms<br>✓, 12 iters               | -538.071370<br>(+0.005901)<br>39.3 ms<br>✓, 9 iters                | -538.077275<br>(-0.000004)<br>69.3 ms<br>✓, 6 iters               | -538.077272<br>(-0.000001)<br>174.0 ms<br>✓, 3 iters   | -538.077271<br>(-0.000000)<br>369.2 ms<br>✓, 2 iters      |
| c2f4   | -473.253828  | -448.860140<br>(+24.393689)<br>1.2 ms<br>✓, 29 iters | -474.600170<br>(-1.346341)<br>24.5 ms<br>✓, 23 iters  | -475.007082<br>(-1.753254)<br>41.6 ms<br>✓, 22 iters  | -471.483866<br>(+1.769962)<br>42.2 ms<br>✓, 25 iters  | -459.451965<br>(+13.801863)<br>13.8 ms<br>✓, 24 iters | -472.451843<br>(+0.801985)<br>33.3 ms<br>✓, 23 iters               | -473.252419<br>(+0.001409)<br>67.4 ms<br>✓, 15 iters               | -473.254802<br>(-0.000974)<br>126.2 ms<br>✓, 11 iters             | -473.253828<br>(-0.000000)<br>324.9 ms<br>✓, 5 iters   | -473.253828<br>(-0.000000)<br>605.3 ms<br>✓, 2 iters      |
| c2f6   | -672.141936  | -629.517307<br>(+42.624629)<br>2.1 ms<br>✓, 27 iters | -673.865498<br>(-1.723563)<br>27.3 ms<br>✓, 23 iters  | -674.297246<br>(-2.155311)<br>41.4 ms<br>✓, 23 iters  | -669.708808<br>(+2.433127)<br>47.9 ms<br>✓, 24 iters  | -653.945789<br>(+18.196147)<br>22.0 ms<br>✓, 25 iters | -669.646933<br>(+2.495002)<br>60.1 ms<br>✓, 21 iters               | -672.139882<br>(+0.002053)<br>113.0 ms<br>✓, 15 iters              | -672.142699<br>(-0.000763)<br>229.1 ms<br>✓, 12 iters             | -672.141937<br>(-0.000001)<br>578.3 ms<br>✓, 6 iters   | -672.141936<br>(-0.000000)<br>1172.7 ms<br>✓, 5 iters     |
| c2h2   | -76.792255   | -67.920019<br>(+8.872236)<br>1.1 ms<br>✓, 10 iters   | -76.968199<br>(-0.175944)<br>27.6 ms<br>✓, 8 iters    | -77.233359<br>(-0.441105)<br>26.1 ms<br>✓, 8 iters    | -75.980169<br>(+0.812086)<br>26.1 ms<br>✓, 9 iters    | -70.261807<br>(+6.530448)<br>3.7 ms<br>✓, 10 iters    | -75.390506<br>(+1.401749)<br>8.5 ms<br>✓, 68 iters                 | -76.619989<br>(+0.172266)<br>13.2 ms<br>✓, 46 iters                | -76.787334<br>(+0.004920)<br>26.8 ms<br>✓, 21 iters               | -76.792253<br>(+0.000002)<br>67.7 ms<br>✓, 10 iters    | -76.792255<br>(-0.000000)<br>129.6 ms<br>✓, 2 iters       |
| c2h3f  | -176.826080  | -157.691856<br>(+19.134224)<br>1.1 ms<br>✗           | -177.202842<br>(-0.376762)<br>39.9 ms<br>✓, 21 iters  | -177.612815<br>(-0.786735)<br>46.7 ms<br>✓, 19 iters  | -175.532764<br>(+1.293316)<br>44.9 ms<br>✓, 23 iters  | -169.247640<br>(+7.578440)<br>4.3 ms<br>✗             | -175.774126<br>(+1.051954)<br>10.4 ms<br>✓, 23 iters               | -176.060698<br>(+0.765382)<br>21.7 ms<br>✓, 21 iters               | -176.824786<br>(+0.001294)<br>44.9 ms<br>✓, 10 iters              | -176.826088<br>(-0.000009)<br>109.6 ms<br>✓, 8 iters   | -176.826080<br>(-0.000000)<br>214.4 ms<br>✓, 1 iters      |
| c2h4   | -78.004021   | -66.875657<br>(+11.128364)<br>0.7 ms<br>✓, 13 iters  | -78.130797<br>(-0.126777)<br>23.1 ms<br>✓, 8 iters    | -78.537452<br>(-0.533431)<br>22.5 ms<br>✓, 9 iters    | -76.917588<br>(+1.086433)<br>24.2 ms<br>✓, 10 iters   | -73.482578<br>(+4.521442)<br>3.0 ms<br>✓, 12 iters    | -77.634628<br>(+0.369392)<br>7.3 ms<br>✓, 12 iters                 | -77.482859<br>(+0.521162)<br>14.0 ms<br>✓, 23 iters                | -78.004000<br>(+0.514020)<br>27.9 ms<br>✓, 18 iters               | -78.004020<br>(+0.000000)<br>69.6 ms<br>✓, 5 iters     | -78.004021<br>(-0.000000)<br>144.9 ms<br>✓, 2 iters       |
| c2h5f  | -178.020838  | -158.755423<br>(+19.265415)<br>1.2 ms<br>✗           | -178.247754<br>(-0.226916)<br>36.8 ms<br>✓, 21 iters  | -178.773272<br>(-0.752434)<br>42.3 ms<br>✓, 20 iters  | -176.432794<br>(+1.588044)<br>44.0 ms<br>✓, 23 iters  | -169.112681<br>(+8.908157)<br>5.4 ms<br>✗             | -177.774113<br>(+0.246725)<br>12.3 ms<br>✓, 20 iters               | <b>-178.018998</b><br>(+0.001840)<br><b>26.8 ms</b><br>✓, 13 iters | -178.021392<br>(-0.000554)<br>54.7 ms<br>✓, 10 iters              | -178.020838<br>(-0.000000)<br>136.2 ms<br>✓, 1 iters   | -178.020838<br>(-0.000000)<br>253.4 ms<br>✓, 0 iters      |

|          |              |                                                       |                                                       |                                                       |                                                       |                                                        |                                                                          |                                                                             |                                                                            |                                                       |                                                       |
|----------|--------------|-------------------------------------------------------|-------------------------------------------------------|-------------------------------------------------------|-------------------------------------------------------|--------------------------------------------------------|--------------------------------------------------------------------------|-----------------------------------------------------------------------------|----------------------------------------------------------------------------|-------------------------------------------------------|-------------------------------------------------------|
| c2h6     | -79.197407   | -66.825667<br>(+12.371740)<br>0.9 ms<br>✓, 16 iters   | -79.249498<br>(-0.052092)<br>22.9 ms<br>✓, 9 iters    | -79.780338<br>(-0.582931)<br>24.1 ms<br>✓, 11 iters   | -77.807287<br>(+1.390120)<br>24.3 ms<br>✓, 13 iters   | -73.543908<br>(+5.653499)<br>3.9 ms<br>✓, 15 iters     | -79.078860<br>(+0.118547)<br>8.8 ms<br>✓, 11 iters                       | <b>-79.196263</b><br>( <b>+0.001143</b> )<br><b>17.5 ms</b><br>✓, 7 iters   | -79.197741<br>(-0.000334)<br>34.6 ms<br>✓, 6 iters                         | -79.197407<br>(-0.000000)<br>87.9 ms<br>✓, 0 iters    | -79.197407<br>(-0.000000)<br>173.6 ms<br>✓, 1 iters   |
| cc12     | -956.627379  | -949.635690<br>(+6.991689)<br>0.9 ms<br>✗             | -956.969017<br>(-0.341638)<br>22.5 ms<br>✓, 19 iters  | -957.196141<br>(-0.568762)<br>42.8 ms<br>✓, 18 iters  | -956.120175<br>(+0.507204)<br>47.6 ms<br>✓, 19 iters  | -951.329038<br>(+5.298341)<br>6.0 ms<br>✓, 24 iters    | -955.065877<br>(+1.561502)<br>15.0 ms<br>✓, 56 iters                     | -956.416414<br>(+0.210965)<br>28.9 ms<br>✓, 70 iters                        | -956.428679<br>(+0.198700)<br>60.5 ms<br>✓, 58 iters                       | -956.428907<br>(+0.198472)<br>150.9 ms<br>✓, 45 iters | -956.625916<br>(+0.001463)<br>312.7 ms<br>✓, 24 iters |
| cc12h2   | -957.918317  | -948.674382<br>(+9.243935)<br>1.0 ms<br>✗             | -958.251759<br>(-0.333442)<br>33.2 ms<br>✓, 16 iters  | -958.577571<br>(-0.659254)<br>44.2 ms<br>✓, 16 iters  | -956.808020<br>(+1.110297)<br>46.9 ms<br>✓, 18 iters  | -950.468566<br>(+7.449751)<br>7.4 ms<br>✓, 20 iters    | -956.413879<br>(+1.504438)<br>17.4 ms<br>✓, 12 iters                     | -957.908750<br>(+0.009567)<br>34.1 ms<br>✓, 9 iters                         | -957.920820<br>(-0.002503)<br>68.2 ms<br>✓, 7 iters                        | -957.918318<br>(-0.000001)<br>179.5 ms<br>✓, 3 iters  | -957.918318<br>(-0.000001)<br>364.3 ms<br>✓, 3 iters  |
| cc12o    | -1031.558511 | -1014.829944<br>(+16.728567)<br>1.0 ms<br>✗           | -1032.344968<br>(-0.786457)<br>33.2 ms<br>✓, 85 iters | -1032.638370<br>(-1.079859)<br>64.0 ms<br>✓, 85 iters | -1030.103930<br>(+1.454581)<br>62.1 ms<br>✓, 92 iters | -1024.152694<br>(+7.405817)<br>8.3 ms<br>✗             | -1029.352366<br>(+2.206145)<br>23.9 ms<br>✓, 68 iters                    | -1031.537068<br>(+0.021443)<br>40.5 ms<br>✓, 29 iters                       | -1031.558353<br>(+0.00158)<br>85.7 ms<br>✓, 15 iters                       | -1031.558514<br>(-0.000003)<br>200.2 ms<br>✓, 9 iters | -1031.558511<br>(-0.000000)<br>400.2 ms<br>✓, 1 iters |
| cc13h    | -1416.773529 | -1404.272889<br>(+12.500640)<br>1.2 ms<br>✓, 28 iters | -1417.403918<br>(-0.630390)<br>34.5 ms<br>✓, 22 iters | -1417.759385<br>(-0.985857)<br>46.3 ms<br>✓, 21 iters | -1415.476654<br>(+1.296875)<br>49.5 ms<br>✓, 24 iters | -1408.689068<br>(+8.084460)<br>12.3 ms<br>✓, 18 iters  | -1414.732183<br>(+2.041345)<br>28.3 ms<br>✓, 15 iters                    | -1416.754639<br>(+0.018890)<br>60.8 ms<br>✓, 11 iters                       | -1416.773773<br>(-0.000244)<br>126.8 ms<br>✓, 7 iters                      | -1416.773545<br>(-0.000017)<br>299.8 ms<br>✓, 5 iters | -1416.773529<br>(-0.000001)<br>567.4 ms<br>✓, 4 iters |
| cc14     | -1875.619526 | -1856.254392<br>(+19.365135)<br>1.6 ms<br>✓, 54 iters | -1876.540267<br>(-0.920741)<br>25.1 ms<br>✓, 31 iters | -1876.916724<br>(-1.297198)<br>44.1 ms<br>✓, 31 iters | -1874.125908<br>(+1.493618)<br>51.7 ms<br>✓, 34 iters | -1867.356678<br>(+8.262848)<br>21.0 ms<br>✓, 25 iters  | -1873.175968<br>(+2.443559)<br>45.9 ms<br>✓, 24 iters                    | -1875.607347<br>(+0.012179)<br>88.9 ms<br>✓, 8 iters                        | -1875.621038<br>(-0.001511)<br>194.5 ms<br>✓, 14 iters                     | -1875.619543<br>(-0.000016)<br>448.3 ms<br>✓, 3 iters | -1875.619526<br>(-0.000000)<br>916.7 ms<br>✓, 1 iters |
| cc1h3    | -499.054132  | -491.014086<br>(+8.040046)<br>0.9 ms<br>✓, 16 iters   | -499.112104<br>(-0.057972)<br>35.7 ms<br>✓, 13 iters  | -499.403283<br>(-0.349151)<br>46.3 ms<br>✓, 11 iters  | -498.115005<br>(+0.939127)<br>44.8 ms<br>✓, 14 iters  | -493.489858<br>(+5.564274)<br>4.0 ms<br>✓, 18 iters    | -498.166824<br>(+0.887308)<br>9.8 ms<br>✓, 11 iters                      | <b>-499.049119</b><br>( <b>+0.005013</b> )<br><b>19.7 ms</b><br>✓, 9 iters  | -499.054124<br>(+0.000008)<br>38.9 ms<br>✓, 6 iters                        | -499.054134<br>(-0.000002)<br>93.8 ms<br>✓, 1 iters   | -499.054132<br>(-0.000000)<br>185.1 ms<br>✓, 0 iters  |
| cf2      | -236.570043  | -222.416287<br>(+14.153757)<br>0.8 ms<br>✗            | -236.911356<br>(-0.341312)<br>22.9 ms<br>✓, 23 iters  | -237.071734<br>(-0.501691)<br>39.2 ms<br>✓, 22 iters  | -235.976261<br>(+0.593783)<br>42.2 ms<br>✓, 23 iters  | -229.899973<br>(+6.670071)<br>3.7 ms<br>✓, 29 iters    | -235.887613<br>(+0.682430)<br>8.7 ms<br>✓, 34 iters                      | -236.208701<br>(+0.361343)<br>15.9 ms<br>✓, 32 iters                        | -236.231442<br>(+0.338602)<br>30.8 ms<br>✓, 27 iters                       | -236.569695<br>(+0.000348)<br>77.0 ms<br>✓, 15 iters  | -236.570043<br>(-0.000000)<br>163.6 ms<br>✓, 0 iters  |
| cf2cl2   | -1155.542628 | -1125.904565<br>(+29.638063)<br>1.3 ms<br>✗           | -1156.475353<br>(-0.932725)<br>34.2 ms<br>✓, 23 iters | -1156.766727<br>(-1.224099)<br>63.5 ms<br>✓, 23 iters | -1154.088035<br>(+1.454593)<br>64.0 ms<br>✓, 24 iters | -1144.956439<br>(+10.586189)<br>12.3 ms<br>✓, 21 iters | -1153.968661<br>(+1.573967)<br>33.0 ms<br>✓, 21 iters                    | -1155.529595<br>(+0.013033)<br>61.7 ms<br>✓, 12 iters                       | -1155.542992<br>(-0.000364)<br>125.1 ms<br>✓, 7 iters                      | -1155.542632<br>(-0.000004)<br>313.9 ms<br>✓, 2 iters | -1155.542628<br>(-0.000000)<br>620.6 ms<br>✓, 1 iters |
| cf4      | -435.484482  | -409.106502<br>(+26.377980)<br>1.3 ms<br>✓, 19 iters  | -436.486070<br>(-1.001588)<br>24.3 ms<br>✓, 19 iters  | -436.688508<br>(-1.204026)<br>40.3 ms<br>✓, 19 iters  | -434.034994<br>(+1.449488)<br>44.3 ms<br>✓, 20 iters  | -424.914505<br>(+10.569977)<br>9.6 ms<br>✓, 21 iters   | -434.771277<br>(+0.713205)<br>24.3 ms<br>✓, 18 iters                     | -435.514927<br>(-0.030445)<br>50.1 ms<br>✓, 16 iters                        | -435.484576<br>(-0.001274)<br>90.4 ms<br>✓, 12 iters                       | -435.484482<br>(-0.000000)<br>221.1 ms<br>✓, 1 iters  | -435.484482<br>(-0.000000)<br>457.4 ms<br>✓, 0 iters  |
| ch2-sing | -38.852978   | -35.217474<br>(+3.635503)<br>0.6 ms<br>✓, 12 iters    | -38.587396<br>(+0.265581)<br>25.1 ms<br>✓, 11 iters   | -38.729770<br>(+0.123207)<br>22.4 ms<br>✓, 11 iters   | -38.599733<br>(+0.253245)<br>22.8 ms<br>✓, 11 iters   | -37.362543<br>(+1.490435)<br>1.7 ms<br>✓, 11 iters     | <b>-38.804695</b><br>( <b>+0.048283</b> )<br><b>4.6 ms</b><br>✓, 8 iters | <b>-38.852755</b><br>( <b>+0.000223</b> )<br><b>8.4 ms</b><br>✓, 6 iters    | <b>-38.852977</b><br>( <b>+0.000000</b> )<br><b>17.1 ms</b><br>✓, 3 iters  | -38.852978<br>(+0.000000)<br>40.9 ms<br>✓, 0 iters    | -38.852978<br>(-0.000000)<br>✓, 0 iters               |
| ch2c     | -76.735107   | -67.925566<br>(+8.809541)<br>0.8 ms<br>✗              | -76.790274<br>(-0.055167)<br>24.1 ms<br>✓, 14 iters   | -77.083340<br>(-0.348233)<br>22.9 ms<br>✓, 16 iters   | -76.011147<br>(+0.723960)<br>21.8 ms<br>✓, 20 iters   | -73.805679<br>(+2.929427)<br>2.7 ms<br>✓, 33 iters     | -76.270821<br>(+0.464286)<br>6.8 ms<br>✓, 34 iters                       | -76.403947<br>(+0.331160)<br>13.9 ms<br>✓, 31 iters                         | -76.413535<br>(+0.321571)<br>26.2 ms<br>✓, 28 iters                        | -76.734935<br>(+0.000172)<br>66.0 ms<br>✓, 15 iters   | -76.735107<br>(+0.000000)<br>137.3 ms<br>✓, 0 iters   |
| ch2clf   | -597.865880  | -584.907146<br>(+12.95735)<br>0.9 ms<br>✗             | -598.152964<br>(-0.287084)<br>45.9 ms<br>✓, 21 iters  | -598.441366<br>(-0.575486)<br>64.3 ms<br>✓, 20 iters  | -596.752420<br>(+1.113460)<br>69.4 ms<br>✓, 22 iters  | -589.668975<br>(+8.196905)<br>6.5 ms<br>✗              | -596.946464<br>(+0.919417)<br>14.2 ms<br>✓, 20 iters                     | <b>-597.859969</b><br>( <b>+0.005911</b> )<br><b>28.6 ms</b><br>✓, 10 iters | -597.865867<br>(-0.000013)<br>58.4 ms<br>✓, 6 iters                        | -597.865880<br>(-0.000000)<br>139.6 ms<br>✓, 1 iters  | -597.865880<br>(-0.000000)<br>282.7 ms<br>✓, 1 iters  |
| ch2f2    | -237.821294  | -221.034483<br>(+16.786811)<br>0.8 ms<br>✗            | -238.084063<br>(-0.262769)<br>38.2 ms<br>✓, 20 iters  | -238.335638<br>(-0.514344)<br>45.9 ms<br>✓, 20 iters  | -236.690525<br>(+1.130769)<br>47.2 ms<br>✓, 21 iters  | -228.591679<br>(+9.229615)<br>4.2 ms<br>✗              | -237.518330<br>(+0.302963)<br>11.9 ms<br>✓, 19 iters                     | <b>-237.820164</b><br>( <b>+0.001130</b> )<br><b>21.2 ms</b><br>✓, 12 iters | -237.821295<br>(-0.000001)<br>41.0 ms<br>✓, 7 iters                        | -237.821294<br>(+0.000000)<br>108.1 ms<br>✓, 0 iters  | -237.821294<br>(-0.000000)<br>212.4 ms<br>✓, 0 iters  |
| ch2nh    | -93.979893   | -82.474432<br>(+11.505461)<br>0.9 ms<br>✗             | -94.103938<br>(-0.124044)<br>38.0 ms<br>✓, 31 iters   | -94.477452<br>(-0.497559)<br>42.1 ms<br>✓, 33 iters   | -92.910294<br>(+1.069599)<br>45.4 ms<br>✓, 35 iters   | -90.264238<br>(+3.715655)<br>2.8 ms<br>✓, 41 iters     | -93.833808<br>(+0.146085)<br>6.6 ms<br>✓, 28 iters                       | <b>-93.978828</b><br>( <b>+0.001065</b> )<br><b>12.1 ms</b><br>✓, 15 iters  | <b>-93.979886</b><br>( <b>+0.000008</b> )<br><b>25.0 ms</b><br>✓, 8 iters  | -93.979893<br>(+0.000000)<br>64.0 ms<br>✓, 0 iters    | -93.979893<br>(-0.000000)<br>118.5 ms<br>✓, 0 iters   |
| ch3f     | -138.993245  | -127.039241<br>(+11.954004)<br>0.9 ms<br>✗            | -138.993224<br>(+0.000021)<br>34.5 ms<br>✓, 20 iters  | -139.250801<br>(-0.257557)<br>43.6 ms<br>✓, 19 iters  | -138.034350<br>(+0.958894)<br>42.4 ms<br>✓, 21 iters  | -132.273081<br>(+6.720164)<br>2.9 ms<br>✗              | -138.825022<br>(+0.168222)<br>6.2 ms<br>✓, 19 iters                      | -138.991899<br>(+0.001345)<br>12.6 ms<br>✓, 12 iters                        | <b>-138.993242</b><br>( <b>+0.000002</b> )<br><b>25.5 ms</b><br>✓, 5 iters | -138.993245<br>(-0.000000)<br>64.3 ms<br>✓, 3 iters   | -138.993245<br>(-0.000000)<br>127.5 ms<br>✓, 1 iters  |
| ch3nh2   | -95.167402   | -82.350152<br>(+12.817251)<br>0.9 ms<br>✗             | -95.239397<br>(-0.071994)<br>37.2 ms<br>✓, 14 iters   | -95.731513<br>(-0.564110)<br>46.3 ms<br>✓, 16 iters   | -94.154052<br>(+1.013350)<br>45.1 ms<br>✓, 16 iters   | -89.758977<br>(+5.408426)<br>3.2 ms<br>✓, 17 iters     | -95.034712<br>(+0.132690)<br>9.4 ms<br>✓, 16 iters                       | <b>-95.166948</b><br>( <b>+0.000455</b> )<br><b>20.5 ms</b><br>✓, 9 iters   | <b>-95.167402</b><br>( <b>+0.000000</b> )<br><b>33.3 ms</b><br>✓, 5 iters  | -95.167402<br>(+0.000000)<br>82.2 ms<br>✓, 0 iters    | -95.167402<br>(-0.000000)<br>157.1 ms<br>✓, 0 iters   |
| ch3ph2   | -381.421525  | -372.031475<br>(+9.390050)<br>1.4 ms<br>✓, 15 iters   | -381.393204<br>(+0.028321)<br>39.4 ms<br>✓, 11 iters  | -381.818543<br>(-0.397018)<br>48.1 ms<br>✓, 12 iters  | -380.525024<br>(+0.896501)<br>44.5 ms<br>✓, 14 iters  | -374.996364<br>(+6.425161)<br>4.2 ms<br>✓, 14 iters    | -380.775955<br>(+0.645569)<br>10.5 ms<br>✓, 13 iters                     | <b>-381.416283</b><br>( <b>+0.005242</b> )<br><b>21.7 ms</b><br>✓, 9 iters  | -381.421513<br>(+0.000012)<br>41.7 ms<br>✓, 6 iters                        | -381.421525<br>(-0.000000)<br>101.8 ms<br>✓, 1 iters  | -381.421525<br>(-0.000000)<br>207.2 ms<br>✓, 1 iters  |
| ch4      | -40.180463   | -33.783430<br>(+6.397032)<br>0.6 ms<br>✓, 14 iters    | -40.015070<br>(+0.165393)<br>25.4 ms<br>✓, 7 iters    | -40.271569<br>(-0.091106)<br>24.1 ms<br>✓, 10 iters   | -39.393953<br>(+0.786509)<br>22.7 ms<br>✓, 12 iters   | -37.711423<br>(+2.469040)<br>2.3 ms<br>✓, 13 iters     | -40.142041<br>(+0.038422)<br>6.5 ms<br>✓, 10 iters                       | <b>-40.180272</b><br>( <b>+0.000191</b> )<br><b>12.0 ms</b><br>✓, 6 iters   | -40.180463<br>(+0.000000)<br>24.0 ms<br>✓, 3 iters                         | -40.180463<br>(-0.000000)<br>58.6 ms<br>✓, 0 iters    | -40.180463<br>(-0.000000)<br>98.5 ms<br>✓, 0 iters    |

|                 |              |                                                       |                                                       |                                                       |                                                       |                                                        |                                                                           |                                                                           |                                                                           |                                                       |                                                        |
|-----------------|--------------|-------------------------------------------------------|-------------------------------------------------------|-------------------------------------------------------|-------------------------------------------------------|--------------------------------------------------------|---------------------------------------------------------------------------|---------------------------------------------------------------------------|---------------------------------------------------------------------------|-------------------------------------------------------|--------------------------------------------------------|
| chf3            | -336.655909  | -315.825054<br>(+20.830855)<br>1.0 ms<br>✓, 31 iters  | -337.269245<br>(-0.613336)<br>36.9 ms<br>✓, 20 iters  | -337.502879<br>(-0.846970)<br>41.3 ms<br>✓, 19 iters  | -335.363781<br>(+1.292128)<br>43.8 ms<br>✓, 21 iters  | -326.237121<br>(+10.418788)<br>6.3 ms<br>✓, 25 iters   | <b>-336.185971</b><br><b>(+0.469938)</b><br><b>15.5 ms</b><br>✓, 19 iters | <b>-336.653578</b><br><b>(+0.002331)</b><br><b>29.5 ms</b><br>✓, 13 iters | -336.656158<br>(-0.000249)<br>63.0 ms<br>✓, 11 iters                      | -336.655909<br>(-0.000000)<br>165.7 ms<br>✓, 5 iters  | -336.655909<br>(-0.000000)<br>298.2 ms<br>✓, 0 iters   |
| cis-c2f2cl2     | -1193.351418 | -1169.555391<br>(+23.796026)<br>3.5 ms<br>✓, 25 iters | -1194.735840<br>(-1.384422)<br>35.2 ms<br>✓, 25 iters | -1195.224597<br>(-1.873180)<br>70.5 ms<br>✓, 24 iters | -1191.617933<br>(+1.733484)<br>70.7 ms<br>✓, 27 iters | -1181.142967<br>(+12.208451)<br>17.1 ms<br>✓, 23 iters | -1191.764580<br>(+1.586838)<br>42.0 ms<br>✓, 24 iters                     | -1204.579424<br>(-11.228006)<br>92.0 ms<br>✓, 25 iters                    | -1213.400929<br>(-20.049511)<br>172.1 ms<br>✓, 29 iters                   | -1193.351440<br>(-0.000022)<br>436.3 ms<br>✓, 7 iters | -1237.555265<br>(-44.203847)<br>869.4 ms<br>✓, 0 iters |
| cl2             | -918.862956  | -913.975979<br>(+4.886977)<br>0.8 ms<br>✓, 8 iters    | -919.010481<br>(-0.147525)<br>12.2 ms<br>✓, 7 iters   | -919.056701<br>(-0.193746)<br>25.1 ms<br>✓, 7 iters   | -918.820921<br>(+0.042035)<br>27.4 ms<br>✓, 7 iters   | -914.693364<br>(+4.169591)<br>4.9 ms<br>✓, 8 iters     | -916.990279<br>(+1.872676)<br>11.5 ms<br>✓, 10 iters                      | -918.221525<br>(+0.641430)<br>20.0 ms<br>✓, 19 iters                      | -918.862449<br>(+0.000507)<br>37.3 ms<br>✓, 16 iters                      | -918.862959<br>(-0.000003)<br>95.6 ms<br>✓, 6 iters   | -918.862956<br>(-0.000001)<br>188.2 ms<br>✓, 2 iters   |
| clcn            | -551.679111  | -539.967463<br>(+11.711648)<br>1.0 ms<br>✓, 25 iters  | -552.196746<br>(-0.517636)<br>33.9 ms<br>✓, 25 iters  | -552.483339<br>(-0.804228)<br>60.5 ms<br>✓, 25 iters  | -550.245372<br>(+1.433739)<br>73.9 ms<br>✓, 25 iters  | -546.629752<br>(+5.049358)<br>4.8 ms<br>✓, 25 iters    | -553.892988<br>(-2.213877)<br>11.5 ms<br>✓, 25 iters                      | -551.671323<br>(+0.007787)<br>41.0 ms<br>✓, 25 iters                      | -551.679087<br>(+0.000024)<br>50.0 ms<br>✓, 7 iters                       | -551.679111<br>(-0.000000)<br>137.0 ms<br>✓, 1 iters  | -551.679111<br>(-0.000000)<br>582.8 ms<br>✓, 0 iters   |
| clcof           | -671.516915  | -651.409403<br>(+20.107512)<br>1.3 ms<br>✓, 66 iters  | -672.324750<br>(-0.807835)<br>51.9 ms<br>✓, 66 iters  | -672.581173<br>(-1.064258)<br>94.1 ms<br>✓, 66 iters  | -670.065540<br>(+1.451375)<br>99.1 ms<br>✓, 70 iters  | -663.854989<br>(+7.661926)<br>6.8 ms<br>✓, 71 iters    | -670.537424<br>(+0.979492)<br>16.2 ms<br>✓, 59 iters                      | <b>-671.507248</b><br><b>(+0.009667)</b><br><b>33.4 ms</b><br>✓, 25 iters | -671.516908<br>(+0.000007)<br>69.9 ms<br>✓, 20 iters                      | -671.516918<br>(-0.000003)<br>167.7 ms<br>✓, 2 iters  | -671.516915<br>(-0.000000)<br>332.6 ms<br>✓, 3 iters   |
| clf             | -558.775217  | -551.769225<br>(+7.005992)<br>0.7 ms<br>✓, 30 iters   | -558.824557<br>(-0.049340)<br>26.6 ms<br>✓, 24 iters  | -558.843113<br>(-0.067896)<br>46.7 ms<br>✓, 24 iters  | -558.690304<br>(+0.084913)<br>45.4 ms<br>✓, 26 iters  | -554.459302<br>(+4.315914)<br>3.4 ms<br>✓, 23 iters    | -558.038206<br>(+0.737010)<br>8.1 ms<br>✓, 25 iters                       | <b>-558.769341</b><br><b>(+0.005876)</b><br><b>16.1 ms</b><br>✓, 14 iters | -558.775212<br>(+0.000005)<br>31.7 ms<br>✓, 6 iters                       | -558.775223<br>(-0.000007)<br>78.1 ms<br>✓, 2 iters   | -558.775217<br>(-0.000000)<br>180.5 ms<br>✓, 0 iters   |
| clno            | -588.581841  | -579.301316<br>(+9.280525)<br>0.9 ms<br>✓, 25 iters   | -588.862912<br>(-0.281071)<br>35.2 ms<br>✓, 25 iters  | -589.068084<br>(-0.486243)<br>72.1 ms<br>✓, 25 iters  | -587.768288<br>(+0.813553)<br>62.5 ms<br>✓, 25 iters  | -582.877278<br>(+5.704562)<br>4.8 ms<br>✓, 25 iters    | -587.219647<br>(+1.362194)<br>11.5 ms<br>✓, 25 iters                      | -588.290981<br>(+0.290860)<br>22.3 ms<br>✓, 25 iters                      | -588.328461<br>(+0.253380)<br>46.5 ms<br>✓, 25 iters                      | -588.511810<br>(+0.070031)<br>118.3 ms<br>✓, 25 iters | -588.581826<br>(+0.000015)<br>234.0 ms<br>✓, 20 iters  |
| co              | -112.667221  | -103.595808<br>(+9.071413)<br>0.7 ms<br>✓, 157 iters  | -112.796500<br>(-0.129279)<br>25.1 ms<br>✓, 157 iters | -112.915490<br>(-0.248269)<br>39.8 ms<br>✓, 155 iters | -112.045092<br>(+0.622128)<br>39.5 ms<br>✓, 173 iters | -109.655463<br>(+3.011758)<br>2.6 ms<br>✓, 134 iters   | <b>-112.541176</b><br><b>(+0.126045)</b><br><b>5.9 ms</b><br>✓, 134 iters | <b>-112.665975</b><br><b>(+0.001245)</b><br><b>13.8 ms</b><br>✓, 66 iters | -112.667220<br>(+0.000001)<br>26.3 ms<br>✓, 6 iters                       | -112.667221<br>(-0.000000)<br>62.7 ms<br>✓, 3 iters   | -112.667221<br>(-0.000000)<br>120.4 ms<br>✓, 1 iters   |
| co2             | -187.514942  | -176.634435<br>(+10.880507)<br>0.7 ms<br>✓, 39 iters  | -188.163180<br>(-0.648238)<br>26.2 ms<br>✓, 32 iters  | -188.364376<br>(-0.849433)<br>42.7 ms<br>✓, 32 iters  | -186.095802<br>(+1.419141)<br>39.7 ms<br>✓, 34 iters  | -180.323489<br>(+7.191453)<br>3.9 ms<br>✓, 34 iters    | -187.298198<br>(+0.216744)<br>10.5 ms<br>✓, 34 iters                      | -187.513861<br>(+0.001081)<br>17.7 ms<br>✓, 34 iters                      | -187.514989<br>(+0.000047)<br>36.6 ms<br>✓, 34 iters                      | -187.514995<br>(-0.000005)<br>96.1 ms<br>✓, 13 iters  | -187.514942<br>(-0.000000)<br>198.3 ms<br>✓, 3 iters   |
| cs              | -435.239631  | -430.216995<br>(+5.022636)<br>0.8 ms<br>✓, 158 iters  | -435.331672<br>(-0.092041)<br>26.7 ms<br>✓, 158 iters | -435.488324<br>(-0.248693)<br>41.5 ms<br>✓, 139 iters | -434.716442<br>(+0.523190)<br>44.3 ms<br>✓, 139 iters | -431.813065<br>(+3.426566)<br>3.5 ms<br>✓, 124 iters   | -434.177192<br>(+1.062439)<br>9.6 ms<br>✓, 124 iters                      | -434.856190<br>(+0.383441)<br>20.1 ms<br>✓, 66 iters                      | -434.901271<br>(+0.338360)<br>34.8 ms<br>✓, 75 iters                      | -435.239568<br>(+0.000063)<br>77.3 ms<br>✓, 28 iters  | -435.239631<br>(-0.000000)<br>155.6 ms<br>✓, 3 iters   |
| cs2             | -832.788299  | -824.844474<br>(+7.943824)<br>1.0 ms<br>✓, 75 iters   | -833.358008<br>(-0.569710)<br>24.1 ms<br>✓, 58 iters  | -833.635426<br>(-0.847128)<br>41.3 ms<br>✓, 54 iters  | -831.388610<br>(+1.399688)<br>44.1 ms<br>✓, 67 iters  | -827.553350<br>(+5.234949)<br>6.5 ms<br>✓, 67 iters    | -831.442010<br>(+1.346289)<br>17.4 ms<br>✓, 44 iters                      | <b>-832.393476</b><br><b>(+0.394823)</b><br><b>35.7 ms</b><br>✓, 44 iters | <b>-832.773990</b><br><b>(+0.014308)</b><br><b>69.3 ms</b><br>✓, 29 iters | -832.788296<br>(+0.000003)<br>155.7 ms<br>✓, 12 iters | -832.788301<br>(-0.000003)<br>311.3 ms<br>✓, 16 iters  |
| cyclobutadiene  | -153.574148  | -136.183353<br>(+17.390794)<br>1.1 ms<br>✓, 14 iters  | -154.561877<br>(-0.987729)<br>23.2 ms<br>✓, 9 iters   | -155.413665<br>(-1.839517)<br>21.5 ms<br>✓, 9 iters   | -151.997662<br>(+1.576486)<br>21.9 ms<br>✓, 10 iters  | -139.986260<br>(+13.587888)<br>7.0 ms<br>✓, 51 iters   | -153.260081<br>(+0.314067)<br>16.2 ms<br>✓, 43 iters                      | -153.394159<br>(+0.179988)<br>33.1 ms<br>✓, 43 iters                      | -153.395504<br>(+0.178644)<br>73.2 ms<br>✓, 49 iters                      | -153.573528<br>(+0.000619)<br>169.9 ms<br>✓, 24 iters | -153.574148<br>(-0.000001)<br>333.0 ms<br>✓, 8 iters   |
| cyclobutane     | -156.029831  | -132.005436<br>(+24.024395)<br>1.5 ms<br>✓, 20 iters  | -156.858703<br>(-0.828872)<br>26.5 ms<br>✓, 11 iters  | -157.960556<br>(-1.930724)<br>25.3 ms<br>✓, 13 iters  | -153.822923<br>(+2.206909)<br>21.5 ms<br>✓, 15 iters  | -144.160037<br>(+11.869795)<br>8.8 ms<br>✓, 19 iters   | -156.054963<br>(-0.025131)<br>22.5 ms<br>✓, 13 iters                      | <b>-156.025717</b><br><b>(+0.004115)</b><br><b>43.9 ms</b><br>✓, 9 iters  | -156.029917<br>(-0.000085)<br>95.4 ms<br>✓, 6 iters                       | -156.029831<br>(-0.000000)<br>215.6 ms<br>✓, 1 iters  | -156.029831<br>(-0.000000)<br>471.8 ms<br>✓, 1 iters   |
| cyclobutene     | -154.832248  | -134.255722<br>(+20.576526)<br>1.2 ms<br>✓, 10 iters  | -155.780713<br>(-0.948465)<br>23.7 ms<br>✓, 10 iters  | -156.764059<br>(-1.931811)<br>26.4 ms<br>✓, 11 iters  | -152.901796<br>(+1.930453)<br>27.3 ms<br>✓, 13 iters  | -142.383829<br>(+12.448419)<br>7.5 ms<br>✓, 26 iters   | -154.118396<br>(+0.713852)<br>20.5 ms<br>✓, 23 iters                      | -154.809554<br>(+0.022694)<br>37.0 ms<br>✓, 16 iters                      | -154.832001<br>(+0.000247)<br>75.0 ms<br>✓, 12 iters                      | -154.832249<br>(-0.000001)<br>194.3 ms<br>✓, 6 iters  | -154.832248<br>(-0.000000)<br>408.1 ms<br>✓, 2 iters   |
| cyclopentadiene | -192.718214  | -169.065388<br>(+23.652827)<br>1.5 ms<br>✓, 20 iters  | -194.065942<br>(-1.347728)<br>29.0 ms<br>✓, 20 iters  | -195.233653<br>(-2.515439)<br>26.4 ms<br>✓, 21 iters  | -190.470735<br>(+2.247480)<br>27.3 ms<br>✓, 25 iters  | -178.978390<br>(+13.739824)<br>13.9 ms<br>✓, 18 iters  | -192.403683<br>(+0.314531)<br>61.2 ms<br>✓, 18 iters                      | -192.760369<br>(-0.042155)<br>61.2 ms<br>✓, 24 iters                      | -192.718425<br>(-0.000210)<br>120.2 ms<br>✓, 15 iters                     | -192.718215<br>(-0.000000)<br>294.5 ms<br>✓, 3 iters  | -192.718214<br>(-0.000000)<br>595.9 ms<br>✓, 2 iters   |
| cyclopropane    | -117.007644  | -99.258395<br>(+17.749250)<br>1.1 ms<br>✓, 17 iters   | -117.678897<br>(-0.671253)<br>26.6 ms<br>✓, 10 iters  | -118.454512<br>(-1.446867)<br>23.8 ms<br>✓, 11 iters  | -115.262745<br>(+1.744900)<br>24.2 ms<br>✓, 13 iters  | -107.802386<br>(+9.205258)<br>5.6 ms<br>✓, 18 iters    | -116.821123<br>(+0.186522)<br>13.3 ms<br>✓, 12 iters                      | -117.006244<br>(+0.001400)<br>26.9 ms<br>✓, 8 iters                       | -117.007641<br>(+0.000003)<br>54.8 ms<br>✓, 5 iters                       | -117.007645<br>(-0.000000)<br>133.0 ms<br>✓, 2 iters  | -117.007644<br>(-0.000000)<br>254.2 ms<br>✓, 1 iters   |
| cyclopropene    | -115.765808  | -101.091458<br>(+14.674350)<br>0.9 ms<br>✓, 25 iters  | -116.519846<br>(-0.754038)<br>23.5 ms<br>✓, 9 iters   | -117.159039<br>(-1.393231)<br>22.2 ms<br>✓, 11 iters  | -114.284785<br>(+1.481023)<br>22.4 ms<br>✓, 13 iters  | -107.777708<br>(+7.988100)<br>4.9 ms<br>✓, 27 iters    | -115.121923<br>(+0.643885)<br>11.9 ms<br>✓, 22 iters                      | -115.116975<br>(+0.648833)<br>24.0 ms<br>✓, 17 iters                      | -115.672590<br>(+0.093218)<br>46.9 ms<br>✓, 17 iters                      | -115.765805<br>(+0.000003)<br>125.6 ms<br>✓, 8 iters  | -115.765808<br>(-0.000000)<br>237.0 ms<br>✓, 0 iters   |
| dioxetan2one    | -301.283713  | -269.598604<br>(+31.685108)<br>1.3 ms<br>✓, 62 iters  | -302.724883<br>(-1.441170)<br>33.7 ms<br>✓, 62 iters  | -303.348049<br>(-2.064336)<br>44.1 ms<br>✓, 62 iters  | -298.754263<br>(+2.529449)<br>42.7 ms<br>✓, 65 iters  | -288.360428<br>(+12.923285)<br>10.7 ms<br>✓, 49 iters  | <b>-300.766571</b><br><b>(+0.517142)</b><br><b>23.3 ms</b><br>✓, 49 iters | -301.286647<br>(-0.002934)<br>46.8 ms<br>✓, 40 iters                      | -301.284327<br>(-0.000614)<br>90.9 ms<br>✓, 24 iters                      | -301.283714<br>(-0.000001)<br>230.8 ms<br>✓, 5 iters  | -301.283713<br>(-0.000000)<br>476.0 ms<br>✓, 1 iters   |
| dioxetane       | -227.599550  | -205.616411<br>(+21.983139)<br>1.2 ms<br>✓, 23 iters  | -228.489653<br>(-0.890103)<br>37.8 ms<br>✓, 23 iters  | -229.139819<br>(-1.540269)<br>45.1 ms<br>✓, 23 iters  | -225.379930<br>(+2.219620)<br>50.1 ms<br>✓, 25 iters  | -213.038447<br>(+14.561102)<br>7.0 ms<br>✓, 21 iters   | <b>-227.195748</b><br><b>(+0.403802)</b><br><b>32.9 ms</b><br>✓, 21 iters | <b>-227.603739</b><br><b>(-0.004189)</b><br><b>68.4 ms</b><br>✓, 17 iters | -227.599543<br>(+0.000007)<br>68.4 ms<br>✓, 5 iters                       | -227.599550<br>(+0.000000)<br>166.5 ms<br>✓, 0 iters  | -227.599550<br>(-0.000000)<br>348.9 ms<br>✓, 0 iters   |

|                  |             |                                                      |                                                       |                                                       |                                                       |                                                       |                                                                           |                                                                            |                                                                            |                                                       |                                                       |
|------------------|-------------|------------------------------------------------------|-------------------------------------------------------|-------------------------------------------------------|-------------------------------------------------------|-------------------------------------------------------|---------------------------------------------------------------------------|----------------------------------------------------------------------------|----------------------------------------------------------------------------|-------------------------------------------------------|-------------------------------------------------------|
| dioxirane        | -188.501623 | -171.093838<br>(+17.407785)<br>0.8 ms<br>✗           | -188.929616<br>(-0.427993)<br>35.4 ms<br>✓, 16 iters  | -189.279573<br>(-0.777950)<br>41.2 ms<br>✓, 16 iters  | -187.247070<br>(+1.254553)<br>41.9 ms<br>✓, 18 iters  | -180.306779<br>(+8.194843)<br>4.0 ms<br>✗             | -188.086171<br>(+0.415452)<br>10.4 ms<br>✓, 178 iters                     | -188.494596<br>(+0.007026)<br>20.6 ms<br>✓, 143 iters                      | -188.501621<br>(+0.000001)<br>44.1 ms<br>✓, 27 iters                       | -188.501623<br>(+0.000000)<br>98.7 ms<br>✓, 3 iters   | -188.501623<br>(-0.000000)<br>200.1 ms<br>✓, 1 iters  |
| dithiotane       | -872.942829 | -859.257909<br>(+13.684920)<br>1.4 ms<br>✓, 20 iters | -873.699682<br>(-0.756853)<br>36.0 ms<br>✓, 16 iters  | -874.381625<br>(-1.438796)<br>45.2 ms<br>✓, 15 iters  | -871.034257<br>(+1.908572)<br>50.1 ms<br>✓, 18 iters  | -861.772456<br>(+11.170373)<br>11.5 ms<br>✓, 22 iters | -871.390010<br>(+1.552819)<br>25.8 ms<br>✓, 15 iters                      | -872.930862<br>(+0.011967)<br>54.3 ms<br>✓, 9 iters                        | -872.942812<br>(+0.000017)<br>104.6 ms<br>✓, 6 iters                       | -872.942830<br>(-0.000001)<br>274.5 ms<br>✓, 1 iters  | -872.942829<br>(-0.000000)<br>514.8 ms<br>✓, 0 iters  |
| ethanol          | -154.011874 | -134.214577<br>(+19.797297)<br>1.4 ms<br>✗           | -154.311215<br>(-0.299341)<br>38.4 ms<br>✓, 21 iters  | -154.923133<br>(-0.911259)<br>49.8 ms<br>✓, 21 iters  | -152.446015<br>(+1.565860)<br>42.8 ms<br>✓, 22 iters  | -145.762071<br>(+8.249803)<br>9.3 ms<br>✗             | <b>-153.805045</b><br><b>(+0.206829)</b><br><b>15.7 ms</b><br>✓, 20 iters | <b>-154.010912</b><br><b>(+0.000962)</b><br><b>33.5 ms</b><br>✓, 13 iters  | -154.011917<br>(-0.000043)<br>68.7 ms<br>✓, 6 iters                        | -154.011875<br>(-0.000000)<br>155.2 ms<br>✓, 2 iters  | -154.011874<br>(-0.000000)<br>311.1 ms<br>✓, 0 iters  |
| f2               | -198.646097 | -189.022850<br>(+9.623247)<br>0.7 ms<br>✓, 12 iters  | -198.463017<br>(-0.847726)<br>13.8 ms<br>✓, 9 iters   | -198.493132<br>(+0.152965)<br>23.6 ms<br>✓, 9 iters   | -198.623690<br>(+0.022407)<br>21.1 ms<br>✓, 8 iters   | -193.173794<br>(+5.472303)<br>2.3 ms<br>✓, 12 iters   | -197.558236<br>(+1.087861)<br>6.6 ms<br>✓, 11 iters                       | -198.017546<br>(+0.628551)<br>11.7 ms<br>✓, 70 iters                       | -198.645997<br>(+0.000100)<br>23.7 ms<br>✓, 29 iters                       | -198.646097<br>(-0.000000)<br>64.8 ms<br>✓, 4 iters   | -198.646097<br>(-0.000000)<br>137.6 ms<br>✓, 1 iters  |
| f2co             | -311.476901 | -289.241291<br>(+22.235611)<br>0.9 ms<br>✗           | -312.324627<br>(-0.847726)<br>33.4 ms<br>✓, 51 iters  | -312.541718<br>(-1.064817)<br>59.2 ms<br>✓, 51 iters  | -310.029142<br>(+1.447759)<br>60.2 ms<br>✓, 54 iters  | -303.116192<br>(+8.360709)<br>4.5 ms<br>✓, 70 iters   | <b>-310.985921</b><br><b>(+0.490981)</b><br><b>11.2 ms</b><br>✓, 48 iters | <b>-311.518999</b><br><b>(-0.042098)</b><br><b>22.9 ms</b><br>✓, 39 iters  | -311.476859<br>(+0.000043)<br>45.5 ms<br>✓, 19 iters                       | -311.476901<br>(-0.000000)<br>111.5 ms<br>✓, 1 iters  | -311.476901<br>(-0.000000)<br>222.7 ms<br>✓, 0 iters  |
| fccf             | -274.362968 | -258.236825<br>(+16.126143)<br>0.9 ms<br>✗           | -275.298312<br>(-0.935344)<br>26.0 ms<br>✓, 21 iters  | -275.600288<br>(-1.237320)<br>46.0 ms<br>✓, 20 iters  | -273.229415<br>(+1.133553)<br>43.9 ms<br>✓, 24 iters  | -265.619063<br>(+8.743905)<br>4.9 ms<br>✓, 28 iters   | -273.214476<br>(+1.148492)<br>12.1 ms<br>✓, 33 iters                      | -274.314540<br>(+0.048428)<br>24.8 ms<br>✓, 33 iters                       | -274.361982<br>(+0.000986)<br>51.6 ms<br>✓, 23 iters                       | -274.362969<br>(-0.000001)<br>129.1 ms<br>✓, 12 iters | -274.362968<br>(-0.000000)<br>247.6 ms<br>✓, 7 iters  |
| fno              | -228.509837 | -215.648013<br>(+12.861825)<br>0.8 ms<br>✗           | -228.787436<br>(-0.277599)<br>36.7 ms<br>✗            | -228.983449<br>(-0.473612)<br>59.9 ms<br>✗            | -227.618866<br>(+0.890972)<br>66.9 ms<br>✗            | -222.005895<br>(+6.503942)<br>3.4 ms<br>✗             | -228.173198<br>(+0.336639)<br>8.8 ms<br>✗                                 | <b>-228.504190</b><br><b>(+0.005648)</b><br><b>17.6 ms</b><br>✓, 137 iters | <b>-228.509769</b><br><b>(+0.000069)</b><br><b>33.3 ms</b><br>✓, 124 iters | -228.509837<br>(-0.000000)<br>82.8 ms<br>✓, 2 iters   | -228.509837<br>(-0.000000)<br>178.4 ms<br>✓, 0 iters  |
| formamide        | -168.854315 | -152.598228<br>(+16.256088)<br>1.0 ms<br>✗           | -169.373319<br>(-0.519004)<br>46.6 ms<br>✓, 58 iters  | -169.835121<br>(-0.980806)<br>60.8 ms<br>✓, 57 iters  | -167.365118<br>(+1.489197)<br>60.9 ms<br>✓, 65 iters  | -161.804081<br>(+7.050234)<br>4.2 ms<br>✗             | -167.644622<br>(+1.209693)<br>10.5 ms<br>✓, 47 iters                      | -168.296353<br>(+0.557962)<br>20.3 ms<br>✓, 30 iters                       | <b>-168.853885</b><br><b>(+0.000430)</b><br><b>40.9 ms</b><br>✓, 11 iters  | -168.854315<br>(+0.000000)<br>102.8 ms<br>✓, 0 iters  | -168.854315<br>(-0.000000)<br>231.3 ms<br>✓, 0 iters  |
| formic-anhydride | -301.311704 | -278.556963<br>(+22.754740)<br>1.4 ms<br>✗           | -302.459694<br>(-1.147990)<br>35.5 ms<br>✓, 119 iters | -302.986531<br>(-1.674828)<br>46.3 ms<br>✓, 118 iters | -298.796556<br>(+2.515148)<br>44.2 ms<br>✓, 132 iters | -289.602257<br>(+11.709447)<br>10.1 ms<br>✗           | -300.130732<br>(+1.180972)<br>24.3 ms<br>✓, 95 iters                      | -301.282294<br>(+0.029409)<br>47.9 ms<br>✓, 84 iters                       | -301.311087<br>(+0.000617)<br>91.4 ms<br>✓, 55 iters                       | -301.311704<br>(+0.000000)<br>230.2 ms<br>✓, 5 iters  | -301.311704<br>(-0.000000)<br>464.6 ms<br>✓, 0 iters  |
| formic           | -188.662894 | -173.876317<br>(+14.786577)<br>0.9 ms<br>✗           | -189.174302<br>(-0.511408)<br>33.8 ms<br>✓, 64 iters  | -189.490255<br>(-0.827361)<br>40.7 ms<br>✓, 63 iters  | -187.319034<br>(+1.343861)<br>41.6 ms<br>✓, 70 iters  | -182.215499<br>(+6.447396)<br>5.0 ms<br>✓, 73 iters   | <b>-188.351153</b><br><b>(+0.311741)</b><br><b>10.6 ms</b><br>✓, 51 iters | <b>-188.660829</b><br><b>(+0.002065)</b><br><b>20.3 ms</b><br>✓, 23 iters  | -188.662821<br>(+0.000073)<br>42.1 ms<br>✓, 27 iters                       | -188.662894<br>(+0.000000)<br>101.0 ms<br>✓, 1 iters  | -188.662894<br>(-0.000000)<br>200.0 ms<br>✓, 0 iters  |
| furan            | -228.523788 | -202.958914<br>(+25.564875)<br>1.8 ms<br>✗           | -230.063898<br>(-1.540110)<br>37.8 ms<br>✓, 38 iters  | -231.015642<br>(-2.491854)<br>48.6 ms<br>✓, 28 iters  | -226.351717<br>(+2.172072)<br>44.7 ms<br>✓, 47 iters  | -212.177976<br>(+16.345812)<br>11.9 ms<br>✗           | -228.195892<br>(+0.327896)<br>28.3 ms<br>✓, 40 iters                      | <b>-228.530204</b><br><b>(-0.006415)</b><br><b>55.2 ms</b><br>✓, 23 iters  | -228.523758<br>(+0.000030)<br>108.4 ms<br>✓, 11 iters                      | -228.523788<br>(-0.000000)<br>269.7 ms<br>✓, 2 iters  | -228.523788<br>(-0.000000)<br>546.3 ms<br>✓, 1 iters  |
| glyoxal          | -226.474933 | -207.807743<br>(+18.667190)<br>1.1 ms<br>✗           | -227.144285<br>(-0.669352)<br>34.3 ms<br>✓, 73 iters  | -227.610210<br>(-1.135277)<br>41.6 ms<br>✓, 72 iters  | -224.232266<br>(+2.242667)<br>44.8 ms<br>✓, 83 iters  | -218.095303<br>(+8.379631)<br>6.4 ms<br>✓, 86 iters   | -225.409139<br>(+1.065794)<br>15.4 ms<br>✓, 63 iters                      | <b>-225.824403</b><br><b>(+0.650531)</b><br><b>32.1 ms</b><br>✓, 62 iters  | -226.472228<br>(+0.002705)<br>59.3 ms<br>✓, 31 iters                       | -226.474932<br>(+0.000001)<br>161.6 ms<br>✓, 10 iters | -226.474938<br>(-0.000004)<br>353.9 ms<br>✓, 15 iters |
| h2               | -1.126726   | -1.074200<br>(+0.052525)<br>0.7 ms<br>✓, 5 iters     | -0.806938<br>(+0.319788)<br>12.8 ms<br>✓, 5 iters     | -0.846739<br>(+0.279986)<br>2.0 ms<br>✓, 5 iters      | -1.090206<br>(+0.036519)<br>2.4 ms<br>✓, 5 iters      | -0.044400<br>(+1.082326)<br>1.7 ms<br>✓, 5 iters      | -0.045503<br>(+1.081223)<br>3.8 ms<br>✓, 5 iters                          | -1.125658<br>(+0.001068)<br>8.8 ms<br>✓, 6 iters                           | -1.126725<br>(+0.000001)<br>14.5 ms<br>✓, 3 iters                          | -1.126726<br>(-0.000000)<br>37.3 ms<br>✓, 0 iters     | -1.126726<br>(-0.000000)<br>62.5 ms<br>✓, 0 iters     |
| h2co             | -113.807811 | -102.694122<br>(+11.113689)<br>0.8 ms<br>✗           | -113.950195<br>(-0.142384)<br>39.8 ms<br>✓, 57 iters  | -114.181871<br>(-0.374060)<br>45.5 ms<br>✓, 57 iters  | -112.635331<br>(+1.172480)<br>48.9 ms<br>✓, 62 iters  | -109.619773<br>(+4.188038)<br>2.6 ms<br>✗             | -113.662647<br>(+0.145164)<br>6.3 ms<br>✓, 48 iters                       | <b>-113.805871</b><br><b>(+0.001940)</b><br><b>12.3 ms</b><br>✓, 23 iters  | <b>-113.807794</b><br><b>(+0.000016)</b><br><b>25.3 ms</b><br>✓, 9 iters   | -113.807811<br>(+0.000000)<br>62.4 ms<br>✓, 0 iters   | -113.807811<br>(-0.000000)<br>125.2 ms<br>✓, 0 iters  |
| h2o              | -75.983831  | -69.622812<br>(+6.361019)<br>1.2 ms<br>✓, 24 iters   | -75.834360<br>(+0.149471)<br>28.1 ms<br>✓, 18 iters   | -75.937782<br>(+0.046049)<br>25.8 ms<br>✓, 19 iters   | -75.866020<br>(+0.117811)<br>24.2 ms<br>✓, 14 iters   | -72.358780<br>(+3.625051)<br>2.2 ms<br>✓, 23 iters    | -75.898398<br>(+0.085434)<br>7.6 ms<br>✓, 18 iters                        | <b>-75.983081</b><br><b>(+0.000750)</b><br><b>12.3 ms</b><br>✓, 11 iters   | -75.983826<br>(+0.000005)<br>28.1 ms<br>✓, 6 iters                         | -75.983831<br>(+0.000000)<br>48.9 ms<br>✓, 0 iters    | -75.983831<br>(-0.000000)<br>86.4 ms<br>✓, 0 iters    |
| h2s              | -398.626802 | -395.123588<br>(+3.503214)<br>0.8 ms<br>✓, 11 iters  | -398.502608<br>(+0.124194)<br>23.0 ms<br>✓, 9 iters   | -398.633888<br>(-0.007086)<br>25.0 ms<br>✓, 9 iters   | -398.518339<br>(+0.108463)<br>26.2 ms<br>✓, 9 iters   | -395.579564<br>(+3.047238)<br>3.0 ms<br>✓, 13 iters   | -397.872076<br>(+0.754726)<br>7.7 ms<br>✓, 9 iters                        | <b>-398.624013</b><br><b>(+0.002789)</b><br><b>14.0 ms</b><br>✓, 7 iters   | -398.626801<br>(+0.000001)<br>25.8 ms<br>✓, 4 iters                        | -398.626802<br>(-0.000000)<br>61.4 ms<br>✓, 1 iters   | -398.626802<br>(-0.000000)<br>109.9 ms<br>✓, 1 iters  |
| hccf             | -175.581615 | -158.806255<br>(+16.775361)<br>0.9 ms<br>✗           | -176.146356<br>(-0.564741)<br>33.6 ms<br>✓, 46 iters  | -176.430977<br>(-0.849362)<br>43.9 ms<br>✓, 47 iters  | -174.525767<br>(+1.055848)<br>43.6 ms<br>✓, 48 iters  | -169.591589<br>(+5.990026)<br>3.9 ms<br>✗             | -174.850662<br>(+0.730953)<br>9.8 ms<br>✓, 52 iters                       | <b>-175.568953</b><br><b>(+0.012662)</b><br><b>19.3 ms</b><br>✓, 34 iters  | -175.581513<br>(+0.000102)<br>38.5 ms<br>✓, 14 iters                       | -175.581615<br>(-0.000000)<br>100.0 ms<br>✓, 2 iters  | -175.581615<br>(-0.000000)<br>203.4 ms<br>✓, 1 iters  |
| hcl              | -460.036945 | -456.927365<br>(+3.109580)<br>0.7 ms<br>✓, 9 iters   | -459.956728<br>(+0.080218)<br>25.5 ms<br>✓, 8 iters   | -460.031781<br>(+0.005164)<br>27.1 ms<br>✓, 8 iters   | -459.966640<br>(+0.070305)<br>27.9 ms<br>✓, 7 iters   | -457.404151<br>(+2.632794)<br>2.4 ms<br>✓, 9 iters    | -459.329005<br>(+0.707940)<br>5.8 ms<br>✓, 9 iters                        | <b>-460.034008</b><br><b>(+0.002937)</b><br><b>13.3 ms</b><br>✓, 6 iters   | <b>-460.036945</b><br><b>(+0.000000)</b><br><b>22.1 ms</b><br>✓, 3 iters   | -460.036945<br>(-0.000000)<br>54.2 ms<br>✓, 0 iters   | -460.036945<br>(+0.000000)<br>109.9 ms<br>✓, 0 iters  |
| hclo4            | -758.511760 | -738.762538<br>(+19.749222)<br>1.4 ms<br>✗           | -761.491686<br>(-2.979927)<br>41.4 ms<br>✓, 42 iters  | -761.726301<br>(-3.214541)<br>51.3 ms<br>✓, 41 iters  | -757.027325<br>(+1.484435)<br>50.3 ms<br>✓, 47 iters  | -744.515029<br>(+13.996731)<br>10.8 ms<br>✗           | -756.731322<br>(+1.780438)<br>33.1 ms<br>✓, 32 iters                      | -758.486764<br>(+0.024996)<br>61.9 ms<br>✓, 31 iters                       | -758.511976<br>(-0.000216)<br>113.1 ms<br>✓, 31 iters                      | -758.511774<br>(-0.000014)<br>281.5 ms<br>✓, 20 iters | -758.511760<br>(-0.000000)<br>550.1 ms<br>✓, 0 iters  |

|          |             |                                                     |                                                       |                                                       |                                                       |                                                      |                                                                          |                                                                            |                                                                           |                                                       |                                                      |
|----------|-------------|-----------------------------------------------------|-------------------------------------------------------|-------------------------------------------------------|-------------------------------------------------------|------------------------------------------------------|--------------------------------------------------------------------------|----------------------------------------------------------------------------|---------------------------------------------------------------------------|-------------------------------------------------------|------------------------------------------------------|
| hcn      | -92.827778  | -81.914741<br>(+10.913037)<br>0.6 ms<br>X           | -92.924982<br>(-0.097204)<br>33.9 ms<br>X             | -93.153960<br>(-0.326181)<br>41.9 ms<br>X             | -91.540891<br>(+1.286887)<br>42.8 ms<br>X             | -90.645247<br>(+2.182532)<br>2.7 ms<br>X             | -92.656290<br>(+0.171489)<br>6.2 ms<br>X                                 | <b>-92.846259</b><br><b>(-0.018481)</b><br><b>13.5 ms</b><br>X             | <b>-92.827823</b><br><b>(-0.000045)</b><br><b>24.2 ms</b><br>X            | -92.827779<br>(-0.000001)<br>60.8 ms<br>✓, 5 iters    | -92.827778<br>(-0.000000)<br>122.5 ms<br>✓, 1 iters  |
| hcno     | -167.536848 | -149.050242<br>(+18.486605)<br>0.9 ms<br>X          | -168.293277<br>(-0.756430)<br>48.0 ms<br>X            | -168.630976<br>(-1.094129)<br>62.4 ms<br>X            | -166.030164<br>(+1.506684)<br>69.1 ms<br>X            | -162.478476<br>(+5.058372)<br>4.0 ms<br>X            | <b>-167.271996</b><br><b>(+0.264852)</b><br><b>9.5 ms</b><br>X           | <b>-167.537145</b><br><b>(-0.000298)</b><br><b>20.1 ms</b><br>X            | <b>-167.536843</b><br><b>(+0.000005)</b><br><b>44.1 ms</b><br>✓, 13 iters | -167.536867<br>(-0.000020)<br>106.2 ms<br>X           | -167.536849<br>(-0.000002)<br>206.6 ms<br>X          |
| hcof     | -212.653427 | -198.122387<br>(+14.531040)<br>0.8 ms<br>X          | -213.100084<br>(-0.446656)<br>45.8 ms<br>✓, 59 iters  | -213.328164<br>(-0.674736)<br>62.0 ms<br>✓, 59 iters  | -211.337422<br>(+1.316005)<br>66.2 ms<br>✓, 64 iters  | -205.166843<br>(+7.486584)<br>4.3 ms<br>X            | -211.757262<br>(+0.896165)<br>8.8 ms<br>✓, 49 iters                      | -212.101357<br>(+0.552071)<br>18.5 ms<br>✓, 27 iters                       | <b>-212.624320</b><br><b>(+0.029107)</b><br><b>37.9 ms</b><br>✓, 37 iters | -212.653422<br>(+0.000005)<br>90.9 ms<br>✓, 10 iters  | -212.653427<br>(+0.000000)<br>191.4 ms<br>✓, 0 iters |
| hf       | -99.983397  | -93.679547<br>(+6.303850)<br>0.6 ms<br>✓, 21 iters  | -99.807365<br>(+0.176032)<br>22.1 ms<br>✓, 16 iters   | -99.862595<br>(+0.120802)<br>22.2 ms<br>✓, 16 iters   | -99.882955<br>(+0.100441)<br>25.3 ms<br>✓, 15 iters   | -96.568815<br>(+3.414582)<br>1.7 ms<br>✓, 20 iters   | -99.907200<br>(+0.076197)<br>4.6 ms<br>✓, 16 iters                       | <b>-99.983229</b><br><b>(+0.000168)</b><br><b>9.1 ms</b><br>✓, 10 iters    | <b>-99.983396</b><br><b>(+0.000001)</b><br><b>19.6 ms</b><br>✓, 4 iters   | -99.983397<br>(-0.000000)<br>34.2 ms<br>✓, 0 iters    | -99.983397<br>(-0.000000)<br>80.2 ms<br>✓, 0 iters   |
| hnc      | -92.814612  | -83.440650<br>(+9.373962)<br>0.7 ms<br>X            | -92.958657<br>(-0.144044)<br>34.1 ms<br>✓, 39 iters   | -93.191766<br>(-0.377154)<br>41.7 ms<br>✓, 51 iters   | -92.118171<br>(+0.696441)<br>41.4 ms<br>✓, 56 iters   | -90.723657<br>(+2.090955)<br>3.2 ms<br>✓, 58 iters   | -92.667346<br>(+0.147266)<br>7.5 ms<br>✓, 48 iters                       | <b>-92.813485</b><br><b>(+0.001127)</b><br><b>13.1 ms</b><br>✓, 38 iters   | <b>-92.814630</b><br><b>(-0.000017)</b><br><b>24.7 ms</b><br>✓, 9 iters   | -92.814613<br>(-0.000001)<br>58.7 ms<br>✓, 6 iters    | -92.814612<br>(-0.000000)<br>122.9 ms<br>✓, 2 iters  |
| hnco     | -167.662159 | -151.012754<br>(+16.649405)<br>0.8 ms<br>X          | -168.300336<br>(-0.638178)<br>44.0 ms<br>X            | -168.634212<br>(-0.972053)<br>62.7 ms<br>X            | -166.286108<br>(+1.376050)<br>64.1 ms<br>X            | -162.894395<br>(+4.767764)<br>4.7 ms<br>X            | -166.793407<br>(+0.868752)<br>10.1 ms<br>X                               | <b>-167.436862</b><br><b>(+0.225297)</b><br><b>20.4 ms</b><br>✓, 125 iters | <b>-167.658420</b><br><b>(+0.003739)</b><br><b>38.1 ms</b><br>✓, 61 iters | -167.662158<br>(+0.000001)<br>107.9 ms<br>✓, 8 iters  | -167.662159<br>(+0.000000)<br>216.2 ms<br>✓, 0 iters |
| hnnn     | -163.728413 | -147.741571<br>(+15.986842)<br>0.9 ms<br>X          | -164.416008<br>(-0.687595)<br>23.7 ms<br>X            | -164.867358<br>(-1.138945)<br>24.0 ms<br>X            | -162.651408<br>(+1.077005)<br>25.1 ms<br>X            | -159.261638<br>(+4.466776)<br>4.5 ms<br>X            | <b>-163.404928</b><br><b>(+0.323485)</b><br><b>9.6 ms</b><br>X           | <b>-163.714294</b><br><b>(+0.014119)</b><br><b>23.3 ms</b><br>X            | -163.726705<br>(+0.001708)<br>39.9 ms<br>X                                | -163.728409<br>(+0.000004)<br>98.0 ms<br>X            | -163.728413<br>(+0.000000)<br>189.4 ms<br>✓, 0 iters |
| hno      | -129.712437 | -119.819422<br>(+9.893015)<br>0.7 ms<br>X           | -129.834734<br>(-0.122297)<br>33.5 ms<br>✓, 142 iters | -130.043730<br>(-0.331293)<br>45.6 ms<br>✓, 136 iters | -129.040421<br>(+0.672016)<br>42.0 ms<br>✓, 156 iters | -126.065517<br>(+3.646920)<br>2.5 ms<br>✓, 136 iters | -129.509623<br>(+0.202814)<br>6.0 ms<br>✓, 105 iters                     | <b>-129.710558</b><br><b>(+0.001879)</b><br><b>11.7 ms</b><br>✓, 15 iters  | <b>-129.712407</b><br><b>(+0.000030)</b><br><b>23.2 ms</b><br>✓, 24 iters | -129.712437<br>(+0.000000)<br>61.1 ms<br>✓, 0 iters   | -129.712437<br>(-0.000000)<br>117.4 ms<br>✓, 0 iters |
| hocl     | -534.788222 | -527.817879<br>(+6.970343)<br>0.7 ms<br>✓, 31 iters | -534.847037<br>(-0.058815)<br>33.7 ms<br>✓, 24 iters  | -534.945273<br>(-0.157051)<br>44.5 ms<br>✓, 26 iters  | -534.676666<br>(+0.111556)<br>46.1 ms<br>✓, 25 iters  | -530.043413<br>(+4.744809)<br>3.2 ms<br>✓, 33 iters  | -533.853244<br>(+0.934978)<br>7.1 ms<br>✓, 21 iters                      | <b>-534.776525</b><br><b>(+0.011697)</b><br><b>15.0 ms</b><br>✓, 16 iters  | <b>-534.787997</b><br><b>(+0.000225)</b><br><b>30.7 ms</b><br>✓, 12 iters | -534.788222<br>(-0.000000)<br>71.7 ms<br>✓, 2 iters   | -534.788222<br>(-0.000000)<br>155.7 ms<br>✓, 0 iters |
| hoclo    | -609.398163 | -598.416888<br>(+10.981275)<br>1.1 ms<br>X          | -610.041019<br>(-0.642856)<br>37.4 ms<br>✓, 64 iters  | -610.183862<br>(-0.785699)<br>49.0 ms<br>✓, 63 iters  | -609.012593<br>(+0.385569)<br>48.1 ms<br>✓, 65 iters  | -602.534131<br>(+6.864032)<br>6.6 ms<br>X            | -607.888368<br>(+1.509795)<br>13.0 ms<br>X                               | <b>-609.204011</b><br><b>(+0.194152)</b><br><b>25.6 ms</b><br>✓, 33 iters  | -609.387477<br>(+0.010686)<br>51.9 ms<br>✓, 31 iters                      | -609.398159<br>(+0.000004)<br>132.1 ms<br>✓, 10 iters | -609.398163<br>(-0.000000)<br>271.8 ms<br>✓, 0 iters |
| hoclo2   | -683.971111 | -668.704381<br>(+15.266730)<br>1.1 ms<br>X          | -685.668435<br>(-1.697325)<br>36.7 ms<br>✓, 61 iters  | -685.859428<br>(-1.888318)<br>47.0 ms<br>✓, 61 iters  | -683.121255<br>(+0.849856)<br>40.8 ms<br>✓, 60 iters  | -673.395487<br>(+10.575624)<br>7.8 ms<br>X           | -682.531706<br>(+1.439405)<br>20.0 ms<br>✓, 51 iters                     | -683.950549<br>(+0.020562)<br>38.5 ms<br>✓, 40 iters                       | -683.970791<br>(+0.000319)<br>77.6 ms<br>✓, 37 iters                      | -683.971111<br>(-0.000000)<br>196.1 ms<br>✓, 7 iters  | -683.971111<br>(-0.000000)<br>390.9 ms<br>✓, 0 iters |
| hocn     | -167.632543 | -152.811194<br>(+14.821349)<br>0.9 ms<br>X          | -168.146723<br>(-0.514180)<br>46.8 ms<br>X            | -168.475057<br>(-0.842514)<br>65.3 ms<br>X            | -166.180519<br>(+1.452024)<br>63.3 ms<br>X            | -162.503036<br>(+5.129507)<br>4.9 ms<br>X            | -166.768668<br>(+0.863874)<br>9.7 ms<br>X                                | <b>-167.258343</b><br><b>(+0.374200)</b><br><b>19.3 ms</b><br>X            | <b>-167.627981</b><br><b>(+0.004561)</b><br><b>38.2 ms</b><br>X           | -167.632541<br>(+0.000002)<br>96.7 ms<br>✓, 10 iters  | -167.632543<br>(+0.000000)<br>199.8 ms<br>✓, 0 iters |
| hof      | -174.684623 | -164.373819<br>(+10.310803)<br>0.8 ms<br>X          | -174.534454<br>(+0.150169)<br>38.3 ms<br>✓, 41 iters  | -174.621431<br>(+0.063192)<br>39.8 ms<br>✓, 37 iters  | -174.477726<br>(+0.206897)<br>39.4 ms<br>✓, 46 iters  | -169.063385<br>(+5.621237)<br>2.7 ms<br>X            | -174.424961<br>(+0.259661)<br>6.9 ms<br>✓, 37 iters                      | <b>-174.675471</b><br><b>(+0.009151)</b><br><b>13.5 ms</b><br>✓, 23 iters  | <b>-174.684300</b><br><b>(+0.000322)</b><br><b>25.2 ms</b><br>✓, 14 iters | -174.684623<br>(+0.000000)<br>63.3 ms<br>✓, 4 iters   | -174.684623<br>(-0.000000)<br>127.1 ms<br>✓, 0 iters |
| honc     | -167.541956 | -151.723233<br>(+15.818723)<br>0.9 ms<br>X          | -168.023420<br>(-0.481464)<br>44.9 ms<br>✓, 80 iters  | -168.366734<br>(-0.824778)<br>60.8 ms<br>✓, 74 iters  | -166.682299<br>(+0.859657)<br>60.1 ms<br>✓, 86 iters  | -160.558446<br>(+6.983510)<br>4.0 ms<br>X            | <b>-167.295690</b><br><b>(+0.246266)</b><br><b>9.6 ms</b><br>✓, 74 iters | <b>-167.540511</b><br><b>(+0.001445)</b><br><b>20.0 ms</b><br>✓, 36 iters  | <b>-167.541951</b><br><b>(+0.000005)</b><br><b>36.7 ms</b><br>✓, 6 iters  | -167.541956<br>(+0.000000)<br>95.5 ms<br>✓, 0 iters   | -167.541956<br>(-0.000000)<br>190.8 ms<br>✓, 0 iters |
| hooh     | -150.707714 | -140.737502<br>(+9.970212)<br>0.7 ms<br>✓, 18 iters | -150.624273<br>(+0.083441)<br>25.3 ms<br>✓, 14 iters  | -150.780343<br>(-0.072628)<br>24.0 ms<br>✓, 14 iters  | -150.510037<br>(+0.197677)<br>24.3 ms<br>✓, 16 iters  | -144.739940<br>(+5.967774)<br>3.2 ms<br>✓, 22 iters  | -149.698079<br>(+1.009636)<br>7.5 ms<br>✓, 19 iters                      | -149.994354<br>(+0.713360)<br>16.6 ms<br>✓, 38 iters                       | -150.706045<br>(+0.001669)<br>30.6 ms<br>✓, 24 iters                      | -150.707714<br>(+0.000000)<br>70.9 ms<br>✓, 4 iters   | -150.707714<br>(-0.000000)<br>137.1 ms<br>✓, 1 iters |
| ketene   | -151.648743 | -130.883087<br>(+20.765656)<br>0.9 ms<br>X          | -152.232662<br>(-0.583919)<br>38.3 ms<br>✓, 98 iters  | -152.610015<br>(-0.961272)<br>43.8 ms<br>✓, 95 iters  | -150.119608<br>(+1.529136)<br>43.7 ms<br>✓, 128 iters | -147.067371<br>(+4.581373)<br>4.6 ms<br>X            | -150.983046<br>(+0.665697)<br>11.7 ms<br>✓, 87 iters                     | <b>-151.262589</b><br><b>(+0.386155)</b><br><b>23.0 ms</b><br>✓, 53 iters  | -151.602606<br>(+0.046137)<br>42.5 ms<br>✓, 55 iters                      | -151.648721<br>(+0.000022)<br>108.0 ms<br>✓, 14 iters | -151.648743<br>(+0.000000)<br>214.9 ms<br>✓, 0 iters |
| methanol | -114.986865 | -102.677064<br>(+12.309801)<br>0.8 ms<br>X          | -115.048256<br>(-0.061392)<br>33.9 ms<br>✓, 21 iters  | -115.388516<br>(-0.401651)<br>42.6 ms<br>✓, 21 iters  | -114.023620<br>(+0.963245)<br>42.0 ms<br>✓, 21 iters  | -108.932061<br>(+6.054804)<br>3.2 ms<br>X            | <b>-114.942273</b><br><b>(+0.044592)</b><br><b>7.8 ms</b><br>✓, 20 iters | <b>-114.987308</b><br><b>(-0.000443)</b><br><b>16.5 ms</b><br>✓, 12 iters  | <b>-114.986862</b><br><b>(+0.000003)</b><br><b>31.7 ms</b><br>✓, 5 iters  | -114.986865<br>(+0.000000)<br>81.8 ms<br>✓, 0 iters   | -114.986865<br>(-0.000000)<br>157.2 ms<br>✓, 0 iters |
| mr_bn    | -78.851376  | -71.928593<br>(+6.922783)<br>0.7 ms<br>X            | -78.922782<br>(-0.071406)<br>23.2 ms<br>X             | -79.055949<br>(-0.204573)<br>38.4 ms<br>X             | -78.185750<br>(+0.665626)<br>40.8 ms<br>X             | -76.245010<br>(+2.606366)<br>2.3 ms<br>X             | -78.741568<br>(+0.109808)<br>4.8 ms<br>X                                 | <b>-78.849951</b><br><b>(+0.001425)</b><br><b>10.6 ms</b><br>X             | <b>-78.851266</b><br><b>(+0.000110)</b><br><b>21.4 ms</b><br>X            | -78.851392<br>(-0.000016)<br>54.0 ms<br>X             | -78.851391<br>(-0.000015)<br>119.1 ms<br>X           |
| mr_c2    | -75.348392  | -70.857729<br>(+4.490663)<br>0.7 ms<br>✓, 10 iters  | -75.519534<br>(-0.171142)<br>12.5 ms<br>✓, 9 iters    | -75.688656<br>(-0.340264)<br>22.8 ms<br>✓, 9 iters    | -74.882390<br>(+0.466002)<br>20.8 ms<br>✓, 10 iters   | -72.421236<br>(+2.927156)<br>2.7 ms<br>✓, 9 iters    | -73.965648<br>(+1.382744)<br>6.3 ms<br>X                                 | -75.299323<br>(+0.049069)<br>12.1 ms<br>X                                  | -75.363227<br>(-0.014835)<br>21.2 ms<br>X                                 | -75.364058<br>(-0.015666)<br>54.3 ms<br>X             | -75.364090<br>(-0.015698)<br>109.9 ms<br>X           |

|           |              |                                                       |                                                       |                                                       |                                                       |                                                      |                                                         |                                                                    |                                                                    |                                                        |                                                       |
|-----------|--------------|-------------------------------------------------------|-------------------------------------------------------|-------------------------------------------------------|-------------------------------------------------------|------------------------------------------------------|---------------------------------------------------------|--------------------------------------------------------------------|--------------------------------------------------------------------|--------------------------------------------------------|-------------------------------------------------------|
| mr_cl2o   | -993.591313  | -981.902364<br>(+11.688948)<br>0.9 ms<br>✗            | -993.846106<br>(-0.254794)<br>22.5 ms<br>✓, 55 iters  | -993.928351<br>(-0.337038)<br>44.2 ms<br>✓, 52 iters  | -993.478425<br>(+0.112887)<br>42.2 ms<br>✓, 55 iters  | -987.920281<br>(+5.671032)<br>7.1 ms<br>✓, 56 iters  | -992.202874<br>(+1.388439)<br>16.2 ms<br>✓, 51 iters    | -993.571410<br>(+0.019903)<br>33.3 ms<br>✓, 26 iters               | -993.591035<br>(+0.000277)<br>61.4 ms<br>✓, 19 iters               | -993.591331<br>(-0.000018)<br>165.1 ms<br>✓, 7 iters   | -993.591313<br>(-0.000000)<br>320.1 ms<br>✓, 1 iters  |
| mr_clf3   | -757.324492  | -739.832688<br>(+17.491804)<br>1.0 ms<br>✗            | -757.921673<br>(-0.597182)<br>27.0 ms<br>✓, 24 iters  | -757.904289<br>(-0.579797)<br>42.6 ms<br>✓, 24 iters  | -756.827886<br>(+0.496605)<br>44.5 ms<br>✓, 24 iters  | -747.616802<br>(+9.707689)<br>7.2 ms<br>✓, 30 iters  | -756.107993<br>(+1.216498)<br>18.6 ms<br>✓, 28 iters    | -757.316310<br>(+0.008182)<br>36.9 ms<br>✓, 33 iters               | -757.324441<br>(+0.000051)<br>72.8 ms<br>✓, 18 iters               | -757.324507<br>(-0.000015)<br>183.4 ms<br>✓, 13 iters  | -757.324492<br>(-0.000000)<br>356.6 ms<br>✓, 19 iters |
| mr_clf5   | -955.814817  | -928.578172<br>(+27.236645)<br>1.7 ms<br>✗            | -957.298984<br>(-1.484167)<br>23.5 ms<br>✓, 36 iters  | -957.187290<br>(-1.372474)<br>43.9 ms<br>✓, 36 iters  | -954.683141<br>(+1.131675)<br>46.2 ms<br>✓, 37 iters  | -940.003060<br>(+15.811756)<br>18.8 ms<br>✗          | -953.986680<br>(+1.828137)<br>42.8 ms<br>✓, 42 iters    | -955.801279<br>(+0.013537)<br>81.5 ms<br>✓, 21 iters               | -955.815561<br>(-0.000744)<br>177.6 ms<br>✓, 33 iters              | -955.814817<br>(-0.000000)<br>408.1 ms<br>✓, 16 iters  | -955.814817<br>(-0.000000)<br>814.9 ms<br>✓, 0 iters  |
| mr_cloocl | -1068.321164 | -1053.147190<br>(+15.173974)<br>1.1 ms<br>✗           | -1068.676536<br>(-0.355371)<br>24.7 ms<br>✓, 31 iters | -1068.799395<br>(-0.478231)<br>41.2 ms<br>✓, 30 iters | -1068.112319<br>(+0.208845)<br>44.9 ms<br>✓, 31 iters | -1060.151938<br>(+8.169226)<br>9.1 ms<br>✓, 64 iters | -1066.034982<br>(+2.286182)<br>22.2 ms<br>✓, 63 iters   | -1068.271992<br>(+0.049172)<br>41.6 ms<br>✓, 36 iters              | -1068.320815<br>(+0.000349)<br>82.8 ms<br>✓, 41 iters              | -1068.321164<br>(-0.000000)<br>225.2 ms<br>✓, 13 iters | -1068.321166<br>(-0.000002)<br>427.8 ms<br>✓, 4 iters |
| mr_f2o    | -273.381615  | -258.456303<br>(+14.925311)<br>0.9 ms<br>✓, 133 iters | -273.339084<br>(+0.042531)<br>26.9 ms<br>✓, 94 iters  | -273.407484<br>(-0.025869)<br>46.9 ms<br>✓, 92 iters  | -273.038923<br>(+0.342692)<br>42.4 ms<br>✓, 99 iters  | -266.417045<br>(+6.964569)<br>4.0 ms<br>✓, 103 iters | -273.006718<br>(+0.374897)<br>9.8 ms<br>✓, 70 iters     | <b>-273.383076</b><br>(-0.001461)<br><b>18.8 ms</b><br>✓, 43 iters | -273.381558<br>(+0.000056)<br>37.2 ms<br>✓, 10 iters               | -273.381614<br>(+0.000000)<br>91.6 ms<br>✓, 6 iters    | -273.381615<br>(-0.000000)<br>210.3 ms<br>✓, 0 iters  |
| mr_foof   | -348.092213  | -329.493654<br>(+18.598559)<br>1.0 ms<br>✗            | -348.252832<br>(-0.160619)<br>23.9 ms<br>✗            | -348.352446<br>(-0.260233)<br>39.3 ms<br>✗            | -347.401056<br>(+0.691157)<br>44.4 ms<br>✗            | -338.365235<br>(+9.726977)<br>5.2 ms<br>✗            | -346.896552<br>(+1.195661)<br>12.5 ms<br>✗              | -347.535360<br>(+0.556853)<br>25.0 ms<br>✗                         | -348.068092<br>(+0.024121)<br>56.9 ms<br>✗                         | -348.092214<br>(-0.000001)<br>129.0 ms<br>✓, 193 iters | -348.092213<br>(-0.000000)<br>247.6 ms<br>✓, 2 iters  |
| mr_o3     | -224.137650  | -210.962220<br>(+13.175430)<br>0.7 ms<br>✗            | -224.597961<br>(-0.460311)<br>13.8 ms<br>✗            | -224.741077<br>(-0.603427)<br>21.2 ms<br>✗            | -223.515073<br>(+0.622577)<br>20.8 ms<br>✗            | -218.453927<br>(+5.683723)<br>3.4 ms<br>✗            | -223.633385<br>(+0.504265)<br>8.6 ms<br>✗               | -223.992456<br>(+0.145194)<br>18.7 ms<br>✗                         | -223.996897<br>(+0.140753)<br>33.1 ms<br>✗                         | -223.997015<br>(+0.140635)<br>96.4 ms<br>✗             | -224.023168<br>(+0.114482)<br>194.8 ms<br>✗           |
| mr_s3     | -1192.329712 | -1184.497788<br>(+7.831923)<br>1.0 ms<br>✓, 32 iters  | -1192.944624<br>(-0.614912)<br>14.0 ms<br>✓, 24 iters | -1193.104945<br>(-0.775233)<br>23.8 ms<br>✓, 24 iters | -1191.966434<br>(+0.363278)<br>24.2 ms<br>✓, 24 iters | -1185.937713<br>(+6.391999)<br>7.3 ms<br>✗           | -1190.747042<br>(+1.582670)<br>17.1 ms<br>✓, 83 iters   | -1192.202812<br>(+0.126900)<br>35.2 ms<br>✓, 80 iters              | -1192.221206<br>(+0.108506)<br>70.0 ms<br>✓, 79 iters              | -1192.221225<br>(+0.108487)<br>182.5 ms<br>✓, 62 iters | -1192.308410<br>(+0.021302)<br>345.7 ms<br>✗          |
| mr_s4-c2v | -1589.764467 | -1578.255384<br>(+11.509083)<br>1.4 ms<br>✗           | -1590.652459<br>(-0.887991)<br>12.7 ms<br>✗           | -1590.878763<br>(-1.114296)<br>23.1 ms<br>✗           | -1589.312508<br>(+0.451960)<br>23.6 ms<br>✗           | -1581.553057<br>(+8.211410)<br>12.3 ms<br>✗          | -1587.486080<br>(+2.278387)<br>31.2 ms<br>✗             | -1589.657206<br>(+0.107261)<br>65.5 ms<br>✗                        | -1589.745479<br>(+0.018988)<br>124.3 ms<br>✗                       | -1589.763737<br>(+0.000730)<br>327.0 ms<br>✗           | -1589.764467<br>(+0.000000)<br>655.2 ms<br>✗          |
| n-butane  | -157.234261  | -129.493006<br>(+27.741256)<br>1.7 ms<br>✗            | -157.754492<br>(-0.520230)<br>27.9 ms<br>✓, 10 iters  | -158.842064<br>(-1.607803)<br>25.4 ms<br>✓, 12 iters  | -154.704743<br>(+2.529518)<br>25.3 ms<br>✓, 13 iters  | -147.873632<br>(+9.360629)<br>11.9 ms<br>✓, 17 iters | -156.976764<br>(+0.257497)<br>29.0 ms<br>✓, 12 iters    | -157.241778<br>(-0.007517)<br>56.2 ms<br>✓, 9 iters                | -157.236522<br>(-0.002260)<br>115.6 ms<br>✓, 7 iters               | -157.234262<br>(-0.000001)<br>273.7 ms<br>✓, 2 iters   | -157.234261<br>(-0.000000)<br>553.0 ms<br>✓, 1 iters  |
| n-pentane | -196.252633  | -159.766386<br>(+36.486247)<br>2.4 ms<br>✗            | -197.002699<br>(-0.750066)<br>24.9 ms<br>✓, 10 iters  | -198.367522<br>(-2.114889)<br>22.2 ms<br>✓, 12 iters  | -193.161242<br>(+3.091391)<br>24.3 ms<br>✓, 13 iters  | -181.597457<br>(+14.655176)<br>19.8 ms<br>✗          | -195.909787<br>(+0.342846)<br>46.2 ms<br>✓, 12 iters    | -196.250994<br>(+0.001639)<br>95.0 ms<br>✓, 8 iters                | -196.252949<br>(-0.000316)<br>194.3 ms<br>✓, 6 iters               | -196.252636<br>(-0.000003)<br>473.2 ms<br>✓, 4 iters   | -196.252633<br>(-0.000000)<br>966.4 ms<br>✓, 0 iters  |
| n2        | -108.867597  | -102.046230<br>(+6.821367)<br>0.8 ms<br>✓, 10 iters   | -108.975693<br>(-0.108096)<br>12.1 ms<br>✓, 8 iters   | -109.173566<br>(-0.305969)<br>19.6 ms<br>✓, 8 iters   | -107.567016<br>(+1.300581)<br>19.9 ms<br>✓, 10 iters  | -102.444534<br>(+6.423063)<br>2.8 ms<br>✗            | -107.922110<br>(+0.945487)<br>6.5 ms<br>✗               | -108.850691<br>(+0.016906)<br>14.9 ms<br>✗                         | -108.866980<br>(+0.000617)<br>24.3 ms<br>✗                         | -108.867597<br>(+0.000000)<br>61.4 ms<br>✗             | -108.867597<br>(-0.000000)<br>118.5 ms<br>✓, 0 iters  |
| n2h4      | -111.117357  | -99.849559<br>(+11.267799)<br>0.9 ms<br>✓, 19 iters   | -111.186037<br>(-0.068680)<br>25.2 ms<br>✓, 12 iters  | -111.637606<br>(-0.520249)<br>25.7 ms<br>✓, 14 iters  | -110.559946<br>(+0.557411)<br>26.4 ms<br>✓, 15 iters  | -104.792444<br>(+6.324913)<br>3.3 ms<br>✓, 18 iters  | -110.192271<br>(+0.925087)<br>9.6 ms<br>✓, 15 iters     | <b>-111.099092</b><br>(+0.018265)<br><b>18.1 ms</b><br>✓, 12 iters | -111.117207<br>(+0.000150)<br>36.3 ms<br>✓, 9 iters                | -111.117357<br>(-0.000000)<br>85.4 ms<br>✓, 1 iters    | -111.117357<br>(-0.000000)<br>158.3 ms<br>✓, 1 iters  |
| n2o       | -183.555025  | -165.564884<br>(+17.990142)<br>0.8 ms<br>✗            | -184.306683<br>(-0.751658)<br>23.0 ms<br>✗            | -184.618652<br>(-1.063626)<br>38.8 ms<br>✗            | -182.336824<br>(+1.218201)<br>42.5 ms<br>✗            | -179.788774<br>(+3.766251)<br>4.0 ms<br>✗            | <b>-183.243713</b><br>(+0.311312)<br><b>9.1 ms</b><br>✗ | <b>-183.554028</b><br>(+0.000997)<br><b>18.6 ms</b><br>✗           | -183.555014<br>(+0.000012)<br>35.1 ms<br>✗                         | -183.555026<br>(-0.000000)<br>101.4 ms<br>✓, 4 iters   | -183.555026<br>(-0.000000)<br>193.4 ms<br>✓, 3 iters  |
| n2o4      | -407.774952  | -378.579547<br>(+29.195405)<br>1.4 ms<br>✗            | -409.519021<br>(-1.744069)<br>23.7 ms<br>✗            | -410.074583<br>(-2.299631)<br>39.6 ms<br>✗            | -404.815877<br>(+2.959075)<br>44.7 ms<br>✗            | -394.819768<br>(+12.955184)<br>12.5 ms<br>✗          | -406.692234<br>(+1.082718)<br>30.1 ms<br>✗              | -407.763647<br>(+0.011305)<br>63.5 ms<br>✗                         | -407.774554<br>(+0.000398)<br>119.0 ms<br>✗                        | -407.774952<br>(+0.000000)<br>302.4 ms<br>✓, 4 iters   | -407.774952<br>(-0.000000)<br>625.4 ms<br>✓, 1 iters  |
| nccn      | -184.498883  | -167.256597<br>(+17.242286)<br>0.9 ms<br>✗            | -185.193809<br>(-0.694926)<br>26.7 ms<br>✗            | -185.670757<br>(-1.171874)<br>42.5 ms<br>✗            | -181.778301<br>(+2.720582)<br>42.9 ms<br>✗            | -179.700177<br>(+4.798707)<br>4.6 ms<br>✗            | -182.898228<br>(+1.600655)<br>11.4 ms<br>✗              | <b>-184.502408</b><br>(-0.003525)<br><b>22.0 ms</b><br>✗           | -184.499845<br>(-0.000961)<br>48.0 ms<br>✗                         | -184.498884<br>(-0.000001)<br>109.6 ms<br>✓, 3 iters   | -184.498883<br>(-0.000000)<br>225.5 ms<br>✓, 1 iters  |
| nh2cl     | -514.988669  | -507.653084<br>(+7.335586)<br>0.9 ms<br>✓, 24 iters   | -515.035513<br>(-0.046843)<br>37.8 ms<br>✓, 19 iters  | -515.285671<br>(-0.297002)<br>46.6 ms<br>✓, 16 iters  | -514.593384<br>(+0.395285)<br>47.1 ms<br>✓, 22 iters  | -510.330833<br>(+4.657837)<br>3.8 ms<br>✓, 22 iters  | -513.478602<br>(+1.510068)<br>9.4 ms<br>✓, 22 iters     | -514.942207<br>(+0.046462)<br>18.1 ms<br>✓, 18 iters               | <b>-514.987351</b><br>(+0.001318)<br><b>37.1 ms</b><br>✓, 15 iters | -514.988669<br>(+0.000000)<br>86.9 ms<br>✓, 5 iters    | -514.988669<br>(+0.000000)<br>176.4 ms<br>✓, 0 iters  |
| nh2f      | -154.907456  | -144.094900<br>(+10.812557)<br>0.8 ms<br>✗            | -154.817794<br>(+0.089662)<br>35.6 ms<br>✓, 27 iters  | -155.036951<br>(-0.129495)<br>40.7 ms<br>✓, 25 iters  | -154.401904<br>(+0.505552)<br>46.6 ms<br>✓, 29 iters  | -148.717551<br>(+6.189905)<br>3.1 ms<br>✗            | -154.702002<br>(+0.205454)<br>7.2 ms<br>✓, 23 iters     | <b>-154.902942</b><br>(+0.004515)<br><b>15.0 ms</b><br>✓, 15 iters | <b>-154.907345</b><br>(+0.000111)<br><b>29.1 ms</b><br>✓, 12 iters | -154.907456<br>(+0.000000)<br>76.2 ms<br>✓, 2 iters    | -154.907456<br>(-0.000000)<br>172.5 ms<br>✓, 0 iters  |
| nh2oh     | -130.923056  | -119.783877<br>(+11.139179)<br>0.8 ms<br>✗            | -130.915061<br>(+0.007995)<br>34.1 ms<br>✓, 25 iters  | -131.215609<br>(-0.292553)<br>41.7 ms<br>✓, 24 iters  | -130.437112<br>(+0.485944)<br>46.1 ms<br>✓, 26 iters  | -124.827132<br>(+6.095924)<br>4.2 ms<br>✗            | -130.813095<br>(+0.109961)<br>6.8 ms<br>✓, 21 iters     | <b>-130.918035</b><br>(+0.005021)<br><b>13.7 ms</b><br>✓, 13 iters | <b>-130.922971</b><br>(+0.000085)<br><b>27.4 ms</b><br>✓, 10 iters | -130.923056<br>(+0.000000)<br>81.3 ms<br>✓, 0 iters    | -130.923056<br>(-0.000000)<br>163.2 ms<br>✓, 0 iters  |

|            |              |                                                      |                                                       |                                                       |                                                       |                                                       |                                                                                  |                                                                                   |                                                                                   |                                                                                   |                                                                                   |
|------------|--------------|------------------------------------------------------|-------------------------------------------------------|-------------------------------------------------------|-------------------------------------------------------|-------------------------------------------------------|----------------------------------------------------------------------------------|-----------------------------------------------------------------------------------|-----------------------------------------------------------------------------------|-----------------------------------------------------------------------------------|-----------------------------------------------------------------------------------|
| nh3        | -56.160561   | -49.593217<br>(+6.567343)<br>0.7 ms<br>✓, 20 iters   | -56.027092<br>(+0.133469)<br>25.0 ms<br>✓, 14 iters   | -56.235375<br>(-0.074814)<br>22.0 ms<br>✓, 16 iters   | -55.860412<br>(+0.300149)<br>23.2 ms<br>✓, 16 iters   | -52.410917<br>(+3.749644)<br>2.2 ms<br>✓, 20 iters    | -56.104316<br>(+0.056245)<br>5.0 ms<br>✓, 15 iters                               | <b>-56.160049</b><br><b>(+0.000511)</b><br><b>9.8 ms</b><br><b>✓, 9 iters</b>     | <b>-56.160558</b><br><b>(+0.000003)</b><br><b>19.7 ms</b><br><b>✓, 6 iters</b>    | -56.160561<br>(-0.000000)<br>46.6 ms<br>✓, 0 iters                                | -56.160561<br>(-0.000000)<br>98.8 ms<br>✓, 0 iters                                |
| ocs        | -510.154449  | -501.880272<br>(+8.274177)<br>1.0 ms<br>X            | -510.754073<br>(-0.599625)<br>34.6 ms<br>X            | -510.991359<br>(-0.836911)<br>65.0 ms<br>X            | -508.752433<br>(+1.402016)<br>66.6 ms<br>X            | -504.184155<br>(+5.970293)<br>5.4 ms<br>X             | -509.444962<br>(+0.709487)<br>12.6 ms<br>X                                       | <b>-510.147709</b><br><b>(+0.006740)</b><br><b>24.4 ms</b><br><b>X</b>            | -510.154433<br>(+0.000016)<br>49.7 ms<br>✓, 16 iters                              | -510.154451<br>(-0.000003)<br>134.1 ms<br>✓, 2 iters                              | -510.154449<br>(-0.000000)<br>292.0 ms<br>✓, 0 iters                              |
| oxadiazole | -260.395601  | -235.030599<br>(+25.365002)<br>1.3 ms<br>X           | -261.744778<br>(-1.349177)<br>45.4 ms<br>✓, 66 iters  | -262.635424<br>(-2.239823)<br>60.6 ms<br>✓, 49 iters  | -258.217005<br>(+2.178596)<br>71.6 ms<br>X            | -248.781853<br>(+11.613748)<br>9.3 ms<br>X            | -259.988629<br>(+0.406971)<br>24.0 ms<br>✓, 59 iters                             | -260.397594<br>(-0.001993)<br>24.0 ms<br>✓, 59 iters                              | -260.395517<br>(+0.000084)<br>45.8 ms<br>✓, 22 iters                              | -260.395601<br>(-0.000000)<br>219.7 ms<br>✓, 2 iters                              | -260.395601<br>(-0.000000)<br>473.5 ms<br>✓, 2 iters                              |
| oxetane    | -191.815955  | -169.115682<br>(+22.700273)<br>1.3 ms<br>X           | -192.620085<br>(-0.804131)<br>37.3 ms<br>✓, 27 iters  | -193.486136<br>(-1.670181)<br>47.7 ms<br>✓, 26 iters  | -189.579528<br>(+2.236426)<br>42.0 ms<br>✓, 29 iters  | -179.389310<br>(+12.426644)<br>7.3 ms<br>X            | -190.696429<br>(+1.119525)<br>17.5 ms<br>✓, 27 iters                             | <b>-191.811370</b><br><b>(+0.004585)</b><br><b>35.9 ms</b><br><b>✓, 16 iters</b>  | -191.815914<br>(+0.000040)<br>71.5 ms<br>✓, 8 iters                               | -191.815955<br>(+0.000000)<br>173.9 ms<br>✓, 0 iters                              | -191.815955<br>(-0.000000)<br>356.0 ms<br>✓, 0 iters                              |
| oxirane    | -152.783185  | -136.595968<br>(+16.187217)<br>1.0 ms<br>X           | -153.403008<br>(-0.619823)<br>37.0 ms<br>✓, 32 iters  | -153.963234<br>(-1.180049)<br>47.6 ms<br>✓, 32 iters  | -150.987929<br>(+1.795256)<br>46.0 ms<br>✓, 36 iters  | -143.018790<br>(+9.764395)<br>5.4 ms<br>X             | <b>-152.567485</b><br><b>(+0.215700)</b><br><b>11.9 ms</b><br><b>✓, 27 iters</b> | <b>-152.780928</b><br><b>(+0.002257)</b><br><b>24.0 ms</b><br><b>✓, 14 iters</b>  | -152.783176<br>(-0.000009)<br>45.7 ms<br>✓, 6 iters                               | -152.783185<br>(-0.000000)<br>115.3 ms<br>✓, 1 iters                              | -152.783185<br>(-0.000000)<br>259.5 ms<br>✓, 1 iters                              |
| oxirene    | -151.508448  | -138.225334<br>(+13.283114)<br>0.8 ms<br>X           | -152.075810<br>(-0.567363)<br>37.6 ms<br>✓, 38 iters  | -152.495823<br>(-0.987376)<br>46.0 ms<br>✓, 37 iters  | -149.961386<br>(+1.547062)<br>49.4 ms<br>X            | -144.062566<br>(+7.445882)<br>4.5 ms<br>X             | -150.901379<br>(+0.607069)<br>11.4 ms<br>✓, 35 iters                             | <b>-151.202148</b><br><b>(+0.306300)</b><br><b>22.0 ms</b><br><b>✓, 26 iters</b>  | -151.501585<br>(+0.006862)<br>46.5 ms<br>✓, 21 iters                              | -151.508444<br>(+0.000004)<br>116.4 ms<br>✓, 11 iters                             | -151.508448<br>(-0.000000)<br>232.4 ms<br>✓, 2 iters                              |
| p2         | -681.355099  | -677.284808<br>(+4.070291)<br>0.8 ms<br>✓, 10 iters  | -681.421267<br>(-0.066168)<br>13.5 ms<br>✓, 8 iters   | -681.545871<br>(-0.190772)<br>24.6 ms<br>✓, 8 iters   | -680.823679<br>(+0.531421)<br>26.4 ms<br>✓, 8 iters   | -677.892024<br>(+3.463075)<br>4.3 ms<br>✓, 15 iters   | -679.835709<br>(+1.519390)<br>10.4 ms<br>X                                       | -680.879559<br>(+0.475541)<br>20.4 ms<br>X                                        | -681.071971<br>(+0.283129)<br>39.2 ms<br>X                                        | -681.353675<br>(+0.001424)<br>110.5 ms<br>X                                       | -681.355099<br>(+0.000000)<br>197.3 ms<br>X                                       |
| p4         | -1362.670836 | -1354.216692<br>(+8.454144)<br>1.4 ms<br>✓, 28 iters | -1363.803240<br>(-1.132404)<br>12.9 ms<br>✓, 12 iters | -1364.283588<br>(-1.612752)<br>27.1 ms<br>✓, 12 iters | -1361.331601<br>(+1.339235)<br>25.8 ms<br>✓, 30 iters | -1354.982389<br>(+7.688448)<br>12.6 ms<br>X           | -1360.061060<br>(+2.609776)<br>37.2 ms<br>✓, 30 iters                            | -1362.624455<br>(+0.046381)<br>68.5 ms<br>✓, 17 iters                             | -1362.670498<br>(+0.000338)<br>127.5 ms<br>✓, 13 iters                            | -1362.670838<br>(-0.000002)<br>314.1 ms<br>✓, 8 iters                             | -1362.670836<br>(-0.000000)<br>623.1 ms<br>✓, 3 iters                             |
| pf3        | -638.940459  | -618.707721<br>(+20.232738)<br>1.0 ms<br>✓, 31 iters | -639.521164<br>(-0.580705)<br>23.9 ms<br>✓, 20 iters  | -639.533843<br>(-0.593384)<br>46.1 ms<br>✓, 20 iters  | -638.463911<br>(+0.476548)<br>47.6 ms<br>✓, 20 iters  | -629.431036<br>(+9.509423)<br>7.3 ms<br>✓, 24 iters   | -637.974690<br>(+0.965770)<br>17.9 ms<br>✓, 19 iters                             | <b>-638.924890</b><br><b>(+0.015569)</b><br><b>35.1 ms</b><br><b>✓, 13 iters</b>  | <b>-638.940605</b><br><b>(-0.000146)</b><br><b>70.7 ms</b><br><b>✓, 7 iters</b>   | <b>-638.940509</b><br><b>(-0.000050)</b><br><b>171.6 ms</b><br><b>✓, 12 iters</b> | <b>-638.940459</b><br><b>(-0.000000)</b><br><b>348.6 ms</b><br><b>✓, 1 iters</b>  |
| pf5        | -837.699467  | -809.093663<br>(+28.605804)<br>1.4 ms<br>X           | -839.222719<br>(-1.523252)<br>24.0 ms<br>✓, 18 iters  | -839.163654<br>(-1.464187)<br>45.4 ms<br>✓, 18 iters  | -836.793731<br>(+0.905736)<br>48.6 ms<br>✓, 21 iters  | -820.049854<br>(+17.649613)<br>17.3 ms<br>✓, 26 iters | -836.135533<br>(+1.563934)<br>42.0 ms<br>✓, 20 iters                             | -837.687610<br>(+0.011858)<br>79.5 ms<br>✓, 20 iters                              | -837.701418<br>(-0.001950)<br>165.3 ms<br>✓, 14 iters                             | -837.699475<br>(-0.000008)<br>403.4 ms<br>✓, 5 iters                              | -837.699468<br>(-0.000000)<br>794.5 ms<br>✓, 1 iters                              |
| ph3        | -342.395807  | -338.455359<br>(+3.940448)<br>0.8 ms<br>✓, 11 iters  | -342.170983<br>(+0.224824)<br>24.2 ms<br>✓, 9 iters   | -342.355341<br>(+0.044066)<br>25.5 ms<br>✓, 10 iters  | -342.181846<br>(+0.213961)<br>27.8 ms<br>✓, 9 iters   | -339.032158<br>(+3.363649)<br>2.7 ms<br>✓, 11 iters   | -341.790639<br>(+0.605168)<br>6.8 ms<br>✓, 9 iters                               | <b>-342.392785</b><br><b>(+0.003022)</b><br><b>14.4 ms</b><br><b>✓, 7 iters</b>   | -342.395805<br>(+0.000002)<br>28.2 ms<br>✓, 4 iters                               | -342.395807<br>(-0.000000)<br>69.2 ms<br>✓, 0 iters                               | -342.395807<br>(-0.000000)<br>140.0 ms<br>✓, 0 iters                              |
| propane    | -118.215867  | -98.248261<br>(+19.967606)<br>1.2 ms<br>✓, 22 iters  | -118.501286<br>(-0.285419)<br>28.0 ms<br>✓, 10 iters  | -119.310639<br>(-1.094772)<br>22.7 ms<br>✓, 12 iters  | -116.249918<br>(+1.687802)<br>25.8 ms<br>✓, 13 iters  | -110.403350<br>(+7.812517)<br>6.8 ms<br>✓, 15 iters   | -118.091830<br>(+0.124037)<br>17.0 ms<br>✓, 12 iters                             | -118.223398<br>(-0.007531)<br><b>33.6 ms</b><br><b>✓, 8 iters</b>                 | -118.215994<br>(-0.000128)<br><b>65.0 ms</b><br><b>✓, 6 iters</b>                 | -118.215867<br>(-0.000000)<br><b>163.4 ms</b><br><b>✓, 3 iters</b>                | -118.215868<br>(-0.000001)<br><b>329.7 ms</b><br><b>✓, 3 iters</b>                |
| propene    | -117.027773  | -98.346336<br>(+18.681436)<br>1.1 ms<br>X            | -117.398366<br>(-0.370593)<br>26.5 ms<br>✓, 16 iters  | -118.083879<br>(-1.056106)<br>22.3 ms<br>✓, 11 iters  | -115.339971<br>(+1.687802)<br>22.6 ms<br>✓, 20 iters  | -111.271323<br>(+5.756450)<br>5.2 ms<br>✓, 23 iters   | -116.835702<br>(-0.192071)<br>12.9 ms<br>✓, 17 iters                             | -117.043728<br>(-0.015955)<br>26.4 ms<br>✓, 15 iters                              | -117.027810<br>(-0.000037)<br><b>52.7 ms</b><br><b>✓, 6 iters</b>                 | -117.027773<br>(-0.000000)<br><b>136.1 ms</b><br><b>✓, 1 iters</b>                | -117.027773<br>(-0.000000)<br><b>265.4 ms</b><br><b>✓, 4 iters</b>                |
| propyne    | -115.822973  | -97.624948<br>(+18.198025)<br>1.0 ms<br>X            | -116.262064<br>(-0.439091)<br>22.8 ms<br>✓, 54 iters  | -116.805852<br>(-0.982879)<br>21.9 ms<br>✓, 47 iters  | -114.349531<br>(+1.473442)<br>22.6 ms<br>✓, 66 iters  | -111.598825<br>(+4.224148)<br>5.0 ms<br>✓, 61 iters   | -115.639670<br>(+0.183303)<br>12.1 ms<br>✓, 48 iters                             | -115.821695<br>(+0.001278)<br><b>25.8 ms</b><br><b>✓, 43 iters</b>                | -115.823009<br>(-0.000036)<br><b>49.1 ms</b><br><b>✓, 21 iters</b>                | -115.822977<br>(-0.000004)<br><b>123.5 ms</b><br><b>✓, 4 iters</b>                | -115.822974<br>(-0.000000)<br><b>247.6 ms</b><br><b>✓, 3 iters</b>                |
| pyrrole    | -208.729298  | -182.612691<br>(+26.116608)<br>1.5 ms<br>X           | -210.309356<br>(-1.580058)<br>35.0 ms<br>✓, 28 iters  | -211.465767<br>(-2.736469)<br>43.7 ms<br>✓, 26 iters  | -206.675609<br>(+2.053689)<br>46.3 ms<br>✓, 26 iters  | -194.465047<br>(+14.264251)<br>14.0 ms<br>X           | <b>-207.413026</b><br><b>(+1.316272)</b><br><b>28.6 ms</b><br><b>✓, 21 iters</b> | <b>-208.626838</b><br><b>(+0.102460)</b><br><b>57.1 ms</b><br><b>✓, 25 iters</b>  | -208.729777<br>(-0.000479)<br><b>112.7 ms</b><br><b>✓, 11 iters</b>               | -208.729298<br>(+0.000000)<br><b>112.7 ms</b><br><b>✓, 0 iters</b>                | -208.729298<br>(-0.000000)<br><b>299.7 ms</b><br><b>✓, 2 iters</b>                |
| s2o        | -869.607861  | -859.779291<br>(+9.828571)<br>1.3 ms<br>X            | -870.392130<br>(-0.784269)<br>23.7 ms<br>X            | -870.538290<br>(-0.930428)<br>44.8 ms<br>X            | -869.136198<br>(+0.471664)<br>44.5 ms<br>X            | -862.707444<br>(+6.900418)<br>7.2 ms<br>X             | -868.359848<br>(+1.248014)<br>15.3 ms<br>X                                       | -869.560624<br>(+0.047237)<br><b>32.1 ms</b><br><b>X</b>                          | -869.602765<br>(+0.005096)<br><b>60.7 ms</b><br><b>X</b>                          | -869.607856<br>(+0.000005)<br><b>151.2 ms</b><br><b>X</b>                         | -869.607866<br>(-0.000005)<br><b>299.7 ms</b><br><b>X</b>                         |
| sf6        | -993.517421  | -960.394104<br>(+33.123317)<br>1.9 ms<br>✓, 31 iters | -995.976385<br>(-2.458964)<br>28.3 ms<br>✓, 17 iters  | -995.857048<br>(-2.339627)<br>43.6 ms<br>✓, 17 iters  | -992.137647<br>(+1.379773)<br>47.5 ms<br>✓, 17 iters  | -973.190995<br>(+20.326426)<br>23.7 ms<br>✓, 22 iters | -991.558347<br>(+1.959074)<br>57.7 ms<br>✓, 16 iters                             | <b>-993.502036</b><br><b>(+0.015385)</b><br><b>117.7 ms</b><br><b>✓, 11 iters</b> | <b>-993.517475</b><br><b>(-0.000054)</b><br><b>231.8 ms</b><br><b>✓, 11 iters</b> | <b>-993.517421</b><br><b>(-0.000000)</b><br><b>601.8 ms</b><br><b>✓, 0 iters</b>  | <b>-993.517421</b><br><b>(-0.000000)</b><br><b>1185.1 ms</b><br><b>✓, 0 iters</b> |
| si2h6      | -581.214896  | -573.682545<br>(+7.532351)<br>1.2 ms<br>✓, 9 iters   | -580.839606<br>(+0.375290)<br>24.5 ms<br>✓, 8 iters   | -581.249856<br>(-0.034960)<br>26.6 ms<br>✓, 8 iters   | -580.593306<br>(+0.621590)<br>28.0 ms<br>✓, 9 iters   | -574.684634<br>(+6.530262)<br>6.5 ms<br>✓, 11 iters   | -580.060969<br>(+1.153927)<br>15.0 ms<br>✓, 9 iters                              | <b>-581.208261</b><br><b>(+0.006636)</b><br><b>31.3 ms</b><br><b>✓, 7 iters</b>   | <b>-581.214892</b><br><b>(+0.000004)</b><br><b>62.1 ms</b><br><b>✓, 4 iters</b>   | <b>-581.214896</b><br><b>(-0.000000)</b><br><b>146.8 ms</b><br><b>✓, 2 iters</b>  | <b>-581.214896</b><br><b>(-0.000000)</b><br><b>307.2 ms</b><br><b>✓, 2 iters</b>  |
| sif4       | -686.719911  | -664.361183<br>(+22.358728)<br>1.1 ms<br>✓, 25 iters | -687.287189<br>(-0.567278)<br>27.8 ms<br>✓, 19 iters  | -687.200701<br>(-0.480791)<br>45.2 ms<br>✓, 19 iters  | -686.167303<br>(+0.552608)<br>48.8 ms<br>✓, 19 iters  | -675.473488<br>(+11.246422)<br>10.8 ms<br>✓, 21 iters | -685.588313<br>(+1.311597)<br>25.0 ms<br>✓, 19 iters                             | <b>-686.700543</b><br><b>(+0.019368)</b><br><b>51.0 ms</b><br><b>✓, 14 iters</b>  | <b>-686.720260</b><br><b>(-0.000349)</b><br><b>97.8 ms</b><br><b>✓, 11 iters</b>  | <b>-686.719927</b><br><b>(-0.000016)</b><br><b>270.1 ms</b><br><b>✓, 8 iters</b>  | <b>-686.719911</b><br><b>(-0.000000)</b><br><b>501.8 ms</b><br><b>✓, 0 iters</b>  |



|               |              |                                                      |                                                       |                                                       |                                                       |                                                        |                                                                           |                                                                           |                                                                          |                                                       |                                                       |
|---------------|--------------|------------------------------------------------------|-------------------------------------------------------|-------------------------------------------------------|-------------------------------------------------------|--------------------------------------------------------|---------------------------------------------------------------------------|---------------------------------------------------------------------------|--------------------------------------------------------------------------|-------------------------------------------------------|-------------------------------------------------------|
| sih3f         | -390.056215  | -379.705256<br>(+10.350958)<br>1.1 ms<br>✗           | -389.886235<br>(+0.169980)<br>34.5 ms<br>✓, 21 iters  | -390.024924<br>(+0.031291)<br>44.7 ms<br>✓, 21 iters  | -389.660750<br>(+0.395465)<br>45.9 ms<br>✓, 21 iters  | -383.913066<br>(+6.143149)<br>3.9 ms<br>✗              | -389.343013<br>(+0.713202)<br>10.1 ms<br>✓, 20 iters                      | <b>-390.049846</b><br><b>(+0.006369)</b><br><b>20.3 ms</b><br>✓, 12 iters | -390.056212<br>(+0.000003)<br>41.0 ms<br>✓, 5 iters                      | -390.056215<br>(-0.000000)<br>97.4 ms<br>✓, 1 iters   | -390.056216<br>(-0.000002)<br>199.5 ms<br>✓, 2 iters  |
| sih4          | -291.173681  | -287.348370<br>(+3.825311)<br>0.9 ms<br>✓, 9 iters   | -290.813459<br>(+0.360222)<br>28.2 ms<br>✓, 8 iters   | -291.018438<br>(+0.155243)<br>27.6 ms<br>✓, 8 iters   | -290.841126<br>(+0.332556)<br>26.6 ms<br>✓, 8 iters   | -288.019494<br>(+3.154188)<br>3.2 ms<br>✓, 9 iters     | -290.602121<br>(+0.571561)<br>7.8 ms<br>✓, 8 iters                        | <b>-291.170057</b><br><b>(+0.003624)</b><br><b>14.0 ms</b><br>✓, 6 iters  | -291.173680<br>(+0.000001)<br>29.6 ms<br>✓, 4 iters                      | -291.173681<br>(-0.000000)<br>72.8 ms<br>✓, 0 iters   | -291.173681<br>(-0.000000)<br>140.1 ms<br>✓, 0 iters  |
| silole        | -443.732812  | -422.162531<br>(+21.570281)<br>1.9 ms<br>✗           | -444.780620<br>(-1.047809)<br>36.6 ms<br>✓, 25 iters  | -445.831903<br>(-2.099092)<br>48.4 ms<br>✓, 24 iters  | -441.870200<br>(+1.862611)<br>51.6 ms<br>✓, 27 iters  | -430.370448<br>(+13.362364)<br>15.3 ms<br>✗            | -442.939594<br>(+0.793217)<br>38.2 ms<br>✓, 20 iters                      | -443.726500<br>(+0.006312)<br>74.6 ms<br>✓, 13 iters                      | -443.732812<br>(-0.000001)<br>150.3 ms<br>✓, 13 iters                    | -443.732813<br>(-0.000001)<br>364.2 ms<br>✓, 2 iters  | -443.732812<br>(-0.000000)<br>744.1 ms<br>✓, 1 iters  |
| sio           | -363.701534  | -355.500350<br>(+8.201185)<br>0.7 ms<br>✗            | -363.603889<br>(+0.097645)<br>27.2 ms<br>✗            | -363.648111<br>(+0.053423)<br>48.8 ms<br>✗            | -363.329473<br>(+0.372062)<br>46.4 ms<br>✗            | -360.626351<br>(+3.075184)<br>4.1 ms<br>✗              | -362.860500<br>(+0.841035)<br>8.3 ms<br>✗                                 | -363.498603<br>(+0.202931)<br>16.1 ms<br>✗                                | -363.697313<br>(+0.004221)<br>31.9 ms<br>✗                               | -363.701597<br>(-0.000063)<br>79.4 ms<br>✗            | -363.701583<br>(-0.000049)<br>157.9 ms<br>✗           |
| so2           | -546.906035  | -536.792722<br>(+10.113133)<br>0.9 ms<br>✓, 38 iters | -547.868862<br>(-0.962827)<br>24.7 ms<br>✓, 36 iters  | -548.001624<br>(-1.095589)<br>44.6 ms<br>✓, 36 iters  | -546.346618<br>(+0.559417)<br>46.1 ms<br>✓, 36 iters  | -539.623764<br>(+7.282271)<br>5.4 ms<br>✗              | -545.836369<br>(+1.069666)<br>12.4 ms<br>✗                                | -546.642984<br>(+0.263051)<br>26.6 ms<br>✗                                | -546.654334<br>(+0.251701)<br>53.2 ms<br>✗                               | -546.900637<br>(+0.005398)<br>117.8 ms<br>✓, 27 iters | -546.906035<br>(+0.000000)<br>231.9 ms<br>✓, 9 iters  |
| so3           | -621.563457  | -606.735588<br>(+14.827869)<br>1.0 ms<br>✗           | -623.363160<br>(-1.799702)<br>23.9 ms<br>✓, 23 iters  | -623.542813<br>(-1.979356)<br>42.6 ms<br>✓, 23 iters  | -620.584831<br>(+0.978626)<br>49.4 ms<br>✓, 23 iters  | -610.762847<br>(+10.800611)<br>7.0 ms<br>✗             | -620.448515<br>(+1.114942)<br>19.1 ms<br>✗                                | -621.548446<br>(+0.015011)<br>32.5 ms<br>✗                                | -621.563775<br>(-0.000318)<br>70.4 ms<br>✗                               | -621.563457<br>(-0.000000)<br>167.6 ms<br>✓, 1 iters  | -621.563457<br>(-0.000000)<br>344.4 ms<br>✓, 0 iters  |
| t-butadiene   | -154.863640  | -128.300689<br>(+26.562951)<br>1.3 ms<br>✗           | -155.553967<br>(-0.690327)<br>24.0 ms<br>✓, 17 iters  | -156.396025<br>(-1.532385)<br>21.9 ms<br>✓, 17 iters  | -152.913863<br>(+1.949777)<br>25.5 ms<br>✓, 21 iters  | -146.496290<br>(+8.367350)<br>7.7 ms<br>✓, 27 iters    | -153.471141<br>(+1.392498)<br>20.1 ms<br>✓, 21 iters                      | -154.860735<br>(+0.002905)<br>37.9 ms<br>✓, 12 iters                      | -154.864996<br>(-0.001356)<br>79.2 ms<br>✓, 12 iters                     | -154.863640<br>(-0.000000)<br>206.7 ms<br>✓, 1 iters  | -154.863640<br>(-0.000000)<br>408.8 ms<br>✓, 1 iters  |
| t-hcoh        | -113.726427  | -104.186515<br>(+9.539912)<br>0.7 ms<br>✗            | -113.836421<br>(-0.109994)<br>38.4 ms<br>✓, 26 iters  | -114.077597<br>(-0.351170)<br>41.5 ms<br>✓, 26 iters  | -113.224039<br>(+0.502389)<br>45.3 ms<br>✓, 27 iters  | -108.226450<br>(+5.499977)<br>2.8 ms<br>✗              | -113.566979<br>(+0.159448)<br>7.3 ms<br>✓, 26 iters                       | <b>-113.725872</b><br><b>(+0.000555)</b><br><b>14.2 ms</b><br>✓, 14 iters | <b>-113.726419</b><br><b>(+0.000008)</b><br><b>28.0 ms</b><br>✓, 6 iters | -113.726427<br>(+0.000000)<br>72.6 ms<br>✓, 2 iters   | -113.726427<br>(-0.000000)<br>135.7 ms<br>✓, 0 iters  |
| t-hono        | -204.520185  | -191.404324<br>(+13.115860)<br>0.9 ms<br>✗           | -204.914963<br>(-0.394778)<br>34.4 ms<br>✓, 162 iters | -205.206307<br>(-0.686122)<br>42.6 ms<br>✓, 157 iters | -203.634469<br>(+0.885716)<br>42.2 ms<br>✓, 177 iters | -198.233042<br>(+6.287143)<br>4.1 ms<br>✗              | <b>-204.218902</b><br><b>(+0.301283)</b><br><b>9.5 ms</b><br>✓, 91 iters  | <b>-204.515437</b><br><b>(+0.004747)</b><br><b>18.0 ms</b><br>✓, 87 iters | -204.520099<br>(+0.000086)<br>36.2 ms<br>✓, 27 iters                     | -204.520185<br>(+0.000000)<br>96.8 ms<br>✓, 1 iters   | -204.520185<br>(-0.000000)<br>187.6 ms<br>✓, 0 iters  |
| t-n2h2        | -109.926845  | -100.732559<br>(+9.194285)<br>0.7 ms<br>✓, 13 iters  | -110.035862<br>(-0.109017)<br>23.5 ms<br>✓, 11 iters  | -110.383433<br>(-0.456589)<br>22.3 ms<br>✓, 11 iters  | -109.088083<br>(+0.838762)<br>22.1 ms<br>✓, 18 iters  | -105.488365<br>(+4.438480)<br>2.8 ms<br>✓, 13 iters    | -109.141889<br>(+0.784956)<br>6.6 ms<br>✓, 56 iters                       | -109.907981<br>(+0.018864)<br>13.2 ms<br>✓, 43 iters                      | -109.926996<br>(-0.000152)<br>26.3 ms<br>✓, 24 iters                     | -109.926845<br>(-0.000000)<br>69.1 ms<br>✓, 7 iters   | -109.926845<br>(-0.000000)<br>131.3 ms<br>✓, 3 iters  |
| tetrahedrane  | -153.506597  | -135.184126<br>(+18.322471)<br>1.2 ms<br>✗           | -155.291386<br>(-1.784788)<br>26.4 ms<br>✓, 10 iters  | -156.265900<br>(-2.759303)<br>22.3 ms<br>✓, 10 iters  | -151.604887<br>(+1.901710)<br>23.0 ms<br>✓, 12 iters  | -138.780502<br>(+14.726095)<br>7.2 ms<br>✓, 18 iters   | -150.313459<br>(+3.193138)<br>17.8 ms<br>✓, 16 iters                      | -153.498955<br>(+0.007643)<br>37.2 ms<br>✓, 11 iters                      | -153.506555<br>(+0.000042)<br>67.8 ms<br>✓, 8 iters                      | -153.506602<br>(-0.000004)<br>170.3 ms<br>✓, 4 iters  | -153.506614<br>(-0.000016)<br>344.4 ms<br>✓, 5 iters  |
| thiophene     | -551.184720  | -530.051776<br>(+21.132945)<br>1.6 ms<br>✗           | -552.683112<br>(-1.498391)<br>39.9 ms<br>✓, 20 iters  | -553.662071<br>(-2.477351)<br>45.0 ms<br>✓, 24 iters  | -549.083851<br>(+2.100869)<br>51.3 ms<br>✓, 25 iters  | -537.640807<br>(+13.543913)<br>13.8 ms<br>✗            | <b>-550.389776</b><br><b>(+0.794944)</b><br><b>33.1 ms</b><br>✓, 20 iters | -551.177255<br>(+0.007466)<br>70.1 ms<br>✓, 15 iters                      | -551.184728<br>(-0.000007)<br>145.0 ms<br>✓, 10 iters                    | -551.184720<br>(-0.000000)<br>358.8 ms<br>✓, 2 iters  | -551.184720<br>(-0.000000)<br>690.8 ms<br>✓, 1 iters  |
| trans-c2f2c12 | -1193.354865 | -1157.194624<br>(+36.160241)<br>1.5 ms<br>✗          | -1194.738826<br>(-1.383961)<br>35.8 ms<br>✓, 24 iters | -1195.227045<br>(-1.872180)<br>63.6 ms<br>✓, 24 iters | -1191.619061<br>(+1.735804)<br>70.7 ms<br>✓, 27 iters | -1181.868320<br>(+11.486545)<br>18.6 ms<br>✓, 24 iters | -1190.816052<br>(+2.538813)<br>49.0 ms<br>✓, 25 iters                     | -1193.596014<br>(-0.241149)<br>85.9 ms<br>✓, 17 iters                     | -1193.354616<br>(+0.000249)<br>182.8 ms<br>✓, 13 iters                   | -1193.354866<br>(-0.000001)<br>429.7 ms<br>✓, 5 iters | -1193.354868<br>(-0.000003)<br>874.2 ms<br>✓, 4 iters |
